# Supplementary material for: Mehran vs. Mehran2 pre-procedure: which score better predicts risk of contrast-induced acute kidney injury in patients with acute coronary syndrome?
Source: PeerJ. 2025 Apr 15;13:e19166. doi: 10.7717/peerj.19166 (PMC12007497; doi:10.7717/peerj.19166)
Supplement: Supplemental Information 1 [file peerj-13-19166-s001.xlsx]

## Sheet: Planilha2
Name	ID	Idade	Sexo	Cor_da_pele	Escolaridade	Tabagismo	Anos/Maço	HAS	DRC	DIALÍTICO	DM	TRATAMENTO_DM_II	DM-INS_DEP	Dislipidemia	Medicamento_para_Dislipidemia	IAM_prévio	QUANTOS_IAMS_PRÉVIOS?	ICP_prévia	Revascularização_prévia	AVC_prévio	Ritmo_prévio_do_paciente	Diagnóstico_de_SCA	KILLIP	USO_DE_DROGAS_VASOATIVAS	Hb_mg/dl_Pré_exame	Hb_mg/dl_Pós_exame_24h	Hb_mg/dl_Pós_exame_48h	dias_entre_IAM_e_ICP	Trombólise_	Tipo_de_trombolítico	Altura	Peso	IMC	FEVE_pré_ICP	IC__PRÉVIO	SCr_(mg/dl)_pré/mais_recente	TFG	Scr_(mg/dl)_Pós_<_24h_ou_menos_	Scr_(mg/dl)_Pós_48h_	Scr_Pós_72h_a_5_DIAS_(mg/dl)	LRA_48h	LRA_IC	Tropo_T_ADMISSÃO	Pico_Tropo_T_	PCR_NÃO_COVID_+_DURANTE_ICP	PCR	Diálise_EM_30_DIAS_PÓS_ICP	FollowUp_1_Diálise	FollowUp_1_Óbito
ATS	1	61	MASCULINO			EX-TABAGISTA <6 meses	41	NÃO	NÃO	NÃO	SIM	AD ORAL	NÂO	NÃO	NÃO USA	NÃO	NENHUM	NÃO	NÃO	NÃO	SINUSAL	IAMSST	1	NÃO	11.6	10.8	11.2	0	NÃO		1.72	73	24.67	39	SIM	0.57	140.521	0.47	0.28	0.6	NÂO	NÂO	69	318	SIM	NÃO	NÃO	0	0
LRS	2	65	FEMININO	BRANCA	EM INCOMPLETO	EX-TABAGISTA >6 meses	20	SIM	SIM	SIM	NÃO	Sem DM	NÂO	NÃO	NÃO USA	NÃO	NENHUM	NÃO	NÃO	NÃO	SINUSAL	ANGI INSTÁVEL	2	NÃO	9.7	8.4	7.8		NÃO		1.53	43	18.36	-	NÂO	7.6	5.00959	6.34	7.89		NÂO	NÂO	140	140	SIM	NÃO	SIM	SIM	0
WRP	3	70	MASCULINO	NEGRA		TABAGISTA	26.5	SIM	NÃO	NÃO	NÃO	Sem DM	NÂO	SIM	NÃO USA	SIM	1	SIM	NÃO	NÃO	FA	IAMCST	1	NÃO	10.6	10.1	9.9	2	NÃO		1.73	66	22.05	60	NÂO	1.03	62.2977	1.11	1.04	1.25	NÂO	NÂO	56	111	NÃO	NÃO	NÃO	0	0
CYC	4	80	MASCULINO	BRANCA		EX-TABAGISTA >6 meses	60	NÃO	NÃO	NÃO	NÃO	Sem DM	NÂO	NÃO	NÃO USA	NÃO	NENHUM	NÃO	NÃO	NÃO		IAMCST	3	SIM	7.3	10.5	7.9	0	NÃO		1.7	75	22.49	60	NÂO	2.72	22.9779	2.64	3.28	3.32	SIM	SIM	760	34431	NÃO	SIM	SIM	SIM	SIM
CE	5	57	MASCULINO	BRANCA	SUPERIOR COMPLETO	EX-TABAGISTA >6 meses	39	SIM	NÃO	NÃO	SIM	AD ORAL	NÂO	NÃO	NÃO USA	NÃO	NENHUM	NÃO	NÃO	NÃO	SINUSAL	IAMCST	1	NÃO	14.3		13.9	3	SIM	TNK	1.8	105	32.4074	60	NÂO	1.14	106.177	1.54			SIM	SIM	195	195	NÃO	NÃO	NÃO	0	0
JAR	7	56	MASCULINO	NEGRA	EF INCOMPLETO	TABAGISTA	50	SIM	NÃO	NÃO	NÃO	Sem DM	NÂO	SIM	SINVASTATI	NÃO	NENHUM	NÃO	NÃO	NÃO		IAMCST	1	NÃO	8.1		7.8	2	SIM	TNK	1.8	76	23.4568	45	SIM	4.39	20.1974			3.36	NÂO	NÂO	367	367	NÃO	NÃO	SIM	SIM	0
acd	8	71	FEMININO	BRANCA	EF COMPLETO	EX-TABAGISTA >6 meses	10	SIM	SIM	NÃO	SIM	AD ORAL	NÂO	NÃO	NÃO USA	NÃO	NENHUM	NÃO	NÃO	NÃO		IAMSST	1	NÃO	13.1	12.1	12.1				1.66	74	26.8544	60	NÂO	1.74	34.6432	1.75	2.49	2.05	SIM	SIM	48	946	SIM	SIM	NÃO	0	SIM
ACR	9	60	MASCULINO	NEGRA	EM COMPLETO	TABAGISTA	20	SIM	NÃO	NÃO	NÃO	Sem DM	NÂO	SIM	ROSUVASTATI	SIM	2	SIM	NÃO	NÃO	SINUSAL	ANGI INSTÁVEL	3	NÃO	14.1	13.3	13.7	2	NÃO		1.68	72	25.5102	46	NÂO	0.99	80.8081	0.98	0.87	0.99	NÂO	NÂO	12	29	NÃO	NÃO	NÃO	0	0
JCP	10	55	MASCULINO	BRANCA	EM COMPLETO	EX-TABAGISTA >6 meses	20	SIM	NÃO	NÃO	NÃO	Sem DM	NÂO	SIM	SINVASTATI	SIM	1	SIM	NÃO	NÃO	SINUSAL	IAMSST	1	NÃO	13.7	13.8	13.6	1	NÃO		1.8	147	45.3704	50	NÂO	0.96	180.773	0.95	0.93		NÂO	NÂO	25	25	NÃO	NÃO	NÃO	0	0
MOS	11	49	MASCULINO	NEGRA	EM INCOMPLETO	TABAGISTA	4	SIM	NÃO	NÃO	NÃO	Sem DM	NÂO	SIM	ATORVASTATI	NÃO	NENHUM	NÃO	NÃO	NÃO		ANGI INSTÁVEL	1	NÃO		14.3	13.6	2	NÃO		1.72	82	27.7177	48	NÂO	0.68	152.41	0.86	0.76	0.91	SIM	SIM	884	884	NÃO	NÃO	NÃO	0	0
IFL	12	73	FEMININO	BRANCA	EM COMPLETO	TABAGISTA	30	SIM	NÃO	NÃO	NÃO	Sem DM	NÂO	SIM	SINVASTATI	NÃO	NENHUM	NÃO	NÃO	NÃO	SINUSAL	IAMCST	4	NÃO	13.7	13.1		1	SIM	TNK	1.6	65	25.3906	55	NÂO	0.99	51.9325	0.99	0.94		NÂO	NÂO	6119	6119	NÃO	NÃO	NÃO	0	0
AAS	13	55	MASCULINO	NEGRA	EM COMPLETO	NÂO TABAGISTA		SIM	NÃO	NÃO	NÃO	Sem DM	NÂO	SIM	SINVASTATI	NÃO	NENHUM	NÃO	NÃO	NÃO		IAMSST	1	NÃO	14.5	15.3		4	SIM	TNK	1.7	106	36.6782	60	NÂO	1.23	101.739	1.21	1.45		NÂO	NÂO	105	219	NÃO	NÃO	NÃO	0	0
FS	14	59	MASCULINO	BRANCA		EX-TABAGISTA >6 meses	50	SIM	NÃO	NÃO	SIM	AD ORAL	NÂO	SIM	ROSUVASTATI	NÃO	NENHUM	NÃO	NÃO	NÃO		IAMCST	2	NÃO	14.8	14	14.4	0	SIM	TNK	1.75	110	35.9184	48	NÂO	1.08	114.583	1.13	1.11	1.12	NÂO	NÂO	18	11956	NÃO	NÃO	NÃO	0	0
AKD	16	83	FEMININO	BRANCA	EM COMPLETO	EX-TABAGISTA >6 meses	30	NÃO	NÃO	NÃO	NÃO	Sem DM	NÂO	NÃO	NÃO USA	NÃO	NENHUM	NÃO	NÃO	NÃO	SINUSAL	IAMCST	2	NÃO	4.9	9.4	10	0	NÃO		1.6	48	18.75	65	NÃO	0.52	62.1154	0.41	0.61	0.61	NÂO	NÂO	304	7342	NÃO	NÃO	NÃO	0	0
ZDS	17	68	MASCULINO	BRANCA	ALFABETO	TABAGISTA	120	SIM	NÃO	NÃO	SIM	INSULI	SIM	NÃO	NÃO USA	SIM	3	SIM	SIM	NÃO	SINUSAL	IAMCST	2	NÃO	13.5	13.1	12.3	1	SIM	TNK	1.65	63	23.1405	62	NÂO	0.63	100	1.23	1.24	0.78	SIM	SIM	1006	1767	NÃO	NÃO	NÃO	0	0
FR	18	62	MASCULINO	BRANCA	EF COMPLETO	TABAGISTA	55	SIM	NÃO	NÃO	SIM	AD ORAL	NÂO	NÃO	NÃO USA	NÃO	NENHUM	NÃO	NÃO	NÃO	SINUSAL	IAMSST	1	NÃO	14.1	13.2	12.9	1	NÃO		1.6	65	25.3906	53	NÂO	0.78	90.2778	0.81	1.27	0.96	SIM	SIM	133	4338	NÃO	NÃO	NÃO	0	0
NS	20	47	MASCULINO	BRANCA	EM COMPLETO	TABAGISTA	50	SIM	NÃO	NÃO	NÃO	Sem DM	NÂO	SIM	SINVASTATI	NÃO	NENHUM	NÃO	NÃO	NÃO	TV	IAMCST	4	SIM	14.7	12.5	11.5	0	SIM	ALTEPLASE	1.72	75	25.3515	41	NÂO	1.12	86.4955	1.22	1	0.97	NÂO	NÂO	21119	21119	NÃO	NÃO	NÃO	0	0
FAGA	21	57	MASCULINO	NEGRA	EF COMPLETO	NÂO TABAGISTA		SIM	SIM	SIM	NÃO	Sem DM	NÂO	NÃO	NÃO USA	SIM	1	SIM	NÃO	NÃO	SINUSAL	IAMSST	1	NÃO	12	12.8	12.7	2	NÃO		1.47	63	29.1545	75	NÂO	4.47	16.2472	6	5.69		SIM	SIM	283	342	NÃO	SIM	SIM	SIM	0
LCFM	22	64	MASCULINO	BRANCA	EF COMPLETO	EX-TABAGISTA >6 meses	5	SIM	NÃO	NÃO	SIM	INSULI	SIM	SIM	SINVASTATI	NÃO	NENHUM	NÃO	NÃO	NÃO	SINUSAL	IAMSST	1	NÃO	16	15.4	14.9	1	NÃO		1.72	95	32.112	60	NÂO	1.08	92.8498	1.11	1.17	1.23	NÂO	NÂO	71	381	NÃO	NÃO	NÃO	0	0
SRFC	24	59	FEMININO	NEGRA	EF INCOMPLETO	TABAGISTA	40	SIM	NÃO	NÃO	NÃO	Sem DM	NÂO	SIM	NÃO USA	NÃO	NENHUM	NÃO	NÃO	NÃO	MARCAPASSO	IAMCST	1	NÃO	12.3	7.6	11.5	0	NÃO		1.55	50	20.8117	66	NÂO	1.48	32.3057	2.36	3.54	3.98	SIM	SIM	3240	11547	NÃO	SIM	SIM	SIM	SIM
HAA	25	76	MASCULINO	BRANCA	EF INCOMPLETO	EX-TABAGISTA >6 meses	5	SIM	SIM	NÃO	SIM	INSULI	SIM	SIM	ATORVASTATI	SIM	>3	SIM	SIM	NÃO	SINUSAL	IAMSST	2	NÃO	11.5	12	9.7	3	NÃO		1.76	88	28.4091	47	NÃO	1.9	41.1696	2.3	2.12	2.15	NÂO	NÂO	1144	1144	NÃO	NÃO	NÃO	0	0
RBP	26	42	MASCULINO	BRANCA	SUPERIOR INCOMPLETO	EX-TABAGISTA >6 meses		NÃO	NÃO	NÃO	NÃO	Sem DM	NÂO	NÃO	NÃO USA	NÃO	NENHUM	NÃO	NÃO	NÃO	SINUSAL	IAMCST	1	NÃO	15.6	15.3	15.3	1	NÃO		1.8	100	30.8642	-	NÂO	1.11	122.623	0.98	1.19	1.05	NÂO	NÂO	60	4201	NÃO	NÃO	NÃO	0	0
LFL	27	61	FEMININO	BRANCA	EF COMPLETO	NÂO TABAGISTA		SIM	NÃO	NÃO	SIM	AD ORAL	NÂO	NÃO	NÃO USA	NÃO	NENHUM	NÃO	NÃO	NÃO	SINUSAL	IAMCST	4	NÃO	11.9	12.9	11.5	0	NÃO		1.6	120	46.875	42	NÂO	0.82	136.484	2.44	3	3.57	SIM	SIM	412	23103	NÃO	SIM	SIM	SIM	0
GRJ	28	53	MASCULINO	BRANCA	EM COMPLETO	TABAGISTA	50	NÃO	NÃO	NÃO	NÃO	Sem DM	NÂO	NÃO	NÃO USA	NÃO	NENHUM	NÃO	NÃO	NÃO	SINUSAL	ANGI INSTÁVEL	1	NÃO	15.3	14.4	13.7	0	NÃO		1.84	72	21.2665	40	NÂO	1.15	75.6522	0.99	1.01	1.23	NÂO	NÂO	11	11	NÃO	NÃO	NÃO	0	0
APJM	29	40	FEMININO	NEGRA		TABAGISTA	52	SIM	NÃO	NÃO	NÃO	Sem DM	NÂO	NÃO	NÃO USA	NÃO	NENHUM	NÃO	NÃO	NÃO	SINUSAL	ANGI INSTÁVEL	1	NÃO	13.4	13.5	12.4	1	NÃO		1.65	65	23.8751	60	NÂO	0.83	92.4531	0.84	0.8		NÂO	NÂO	8	6	NÃO	NÃO	NÃO	0	0
IBS	30	70	FEMININO	BRANCA		EX-TABAGISTA >6 meses	25	SIM	NÃO	NÃO	SIM	AD ORAL	NÂO	NÃO	NÃO USA	NÃO	NENHUM	NÃO	NÃO	NÃO	SINUSAL	IAMCST	1	NÃO	15.5	13.8	14.4	1	NÃO		1.6	89	34.7656	65	NÂO	0.76	96.7745	0.79	0.67		NÂO	NÂO	161	161	NÃO	NÃO	NÃO	0	0
AGP	31	77	MASCULINO	NEGRA	EF INCOMPLETO	EX-TABAGISTA >6 meses	70	SIM	NÃO	NÃO	SIM	AD ORAL	NÂO	SIM	SINVASTATI	NÃO	NENHUM	NÃO	NÃO	NÃO	SINUSAL	IAMSST	2	NÃO	15.4	14.6	15.5	6	NÃO		1.68	55	19.487	15	SIM	1.08	44.5602	1.34	1.26	1.67	NÂO	SIM	65	65	NÃO	NÃO	NÃO	0	0
AI	32	66	MASCULINO	BRANCA	EF COMPLETO	TABAGISTA	65	SIM	NÃO	NÃO	SIM	AD ORAL	NÂO	SIM	SINVASTATI	NÃO	NENHUM	NÃO	NÃO	NÃO	SINUSAL	IAMCST	3	NÃO	14.5	14.3	13.1	1	NÃO		1.7	72	24.9135	20	NÃO	0.8	92.5	0.92	0.84	0.74	NÂO	NÂO	8061	8061	NÃO	SIM	NÃO	0	SIM
CRR	33	78	FEMININO	BRANCA	ALFABETO	NÂO TABAGISTA		SIM	NÃO	NÃO	NÃO	Sem DM	NÂO	SIM	SINVASTATI	NÃO	NENHUM	NÃO	NÃO	NÃO	SINUSAL	IAMSST	1	NÃO	10.3	11.3	11.5	2	NÃO		1.5	73	32.4444	50	NÃO	1.77	30.1875	1.61	1.23		NÂO	NÂO			NÃO	NÃO	NÃO	0	0
LAF	34	59	MASCULINO	BRANCA	SUPERIOR COMPLETO	NÂO TABAGISTA		NÃO	NÃO	NÃO	NÃO	Sem DM	NÂO	NÃO	NÃO USA	NÃO	NENHUM	NÃO	NÃO	NÃO	FV	IAMCST	1	SIM	14.5	14.2	13.2	0	NÃO		1.7	85	29.4118	46	NÃO	1.33	71.8985	1.03	0.97	1.4	NÂO	NÂO	719	7589	NÃO	SIM	NÃO	0	0
CADP	35	44	MASCULINO	NEGRA	SUPERIOR COMPLETO	TABAGISTA	27	SIM	NÃO	NÃO	NÃO	Sem DM	NÂO	SIM	ATORVASTATI	SIM	3	SIM	NÃO	NÃO	SINUSAL	ANGI INSTÁVEL	1	NÃO	15.8	15	14.3	0	NÃO		1.68	103	36.4938	56	NÃO	1.08	127.16		1.15		NÂO	NÂO	5	18	NÃO	NÃO	NÃO	0	0
DABS	36	61	FEMININO	BRANCA	EF COMPLETO	TABAGISTA	44	NÃO	NÃO	NÃO	NÃO	Sem DM	NÂO		NÃO USA	NÃO	NENHUM	NÃO	NÃO	NÃO	SINUSAL	IAMCST	1	NÃO	14.8	14	13.6	0	NÃO		1.6	80	31.25	56	NÃO	0.9	82.9012	0.79	1		NÂO	NÂO	216	7480	NÃO	NÃO	NÃO	0	0
NFC	37	60	MASCULINO	NEGRA		EX-TABAGISTA >6 meses	6	SIM	SIM	NÃO	NÃO	Sem DM	NÂO		NÃO USA	NÃO	NENHUM	NÃO	NÃO	NÃO	SINUSAL	IAMCST	1	NÃO	13.4	12.6	12.9	0	NÃO		1.7	68	23.5294	3	NÃO	1.1	68.6869	1.2	1.55		SIM	SIM	2330	3682	NÃO	NÃO	NÃO	0	0
JFQ	38	64	MASCULINO	BRANCA	EF INCOMPLETO	EX-TABAGISTA >6 meses		SIM	NÃO	NÃO	NÃO	Sem DM	NÂO	NÃO	NÃO USA	NÃO	NENHUM	NÃO	NÃO	NÃO	SINUSAL	IAMCST	1	NÃO	12.6	11.4		1	NÃO		1.75	63	20.5714	-	NÃO	0.73	91.0959	0.69			NÂO	NÂO	11289	1685	NÃO	NÃO	NÃO	0	0
IM	39	55	MASCULINO			EX-TABAGISTA >6 meses	45	NÃO	NÃO	NÃO	NÃO	Sem DM	NÂO	NÃO	NÃO USA	NÃO	NENHUM	NÃO	NÃO	NÃO	SINUSAL	ANGI INSTÁVEL	1	NÃO	16.3	15.7	16.2	1	NÃO		1.8	86	26.5432	68	NÃO	0.88	115.372	0.9	0.98	0.95	NÂO	NÂO	101	101	NÃO	NÃO	NÃO	0	0
AAS	40	64	MASCULINO	BRANCA	EF INCOMPLETO	NÂO TABAGISTA		SIM	NÃO	NÃO	NÃO	Sem DM	NÂO	NÃO	NÃO USA	NÃO	NENHUM	NÃO	NÃO	NÃO	SINUSAL	ANGI INSTÁVEL	1	NÃO	16.3		14.8	1	NÃO		1.65	80	29.3848	-	NÃO	0.96	87.963	0.92	0.97		NÂO	NÂO	126	126	NÃO	NÃO	NÃO	0	0
AAP	41	83	MASCULINO	BRANCA	EF COMPLETO	EX-TABAGISTA >6 meses	126	SIM	NÃO	NÃO	SIM	AD ORAL	NÂO	SIM	ATORVASTATI	NÃO	NENHUM	NÃO	NÃO	NÃO	FA	IAMSST	1	NÃO	15.9	9.9	14.1	1	NÃO		1.68	68	24.093	42	NÃO	0.79	68.1435	1.12	1.09		SIM	SIM	126	126	NÃO	NÃO	NÃO	0	0
VR	42	68	MASCULINO	BRANCA	EM COMPLETO	NÂO TABAGISTA		SIM	SIM	NÃO	SIM	AD ORAL	NÂO	SIM	ATORVASTATI	NÃO	NENHUM	NÃO	NÃO	NÃO	SINUSAL	IAMSST	2	NÃO	11.4	11.7	10.9	1	NÃO		1.73	74	24.7252	40	SIM	2.38	31.0924	2.48	2.59	2.47	NÂO	NÂO			NÃO	NÃO	NÃO	0	0
JAA	43	69	MASCULINO	BRANCA	SUPERIOR COMPLETO	NÂO TABAGISTA			SIM	SIM	NÃO	Sem DM	NÂO	SIM	SINVASTATI	NÃO	NENHUM	NÃO	NÃO	NÃO	SINUSAL	IAMCST	1	NÃO	7.4			0	NÃO		1.68	54	19.1327	50	SIM	0.49	108.673			1.73	NÂO	SIM	318	318	NÃO	NÃO	SIM	SIM	0
MBM	44	51	MASCULINO	BRANCA	EM COMPLETO	TABAGISTA	35		NÃO	NÃO	NÃO	Sem DM	NÂO	NÃO	NÃO USA	NÃO	NENHUM	NÃO	NÃO	NÃO	SINUSAL	IAMCST	1	NÃO	15.2		14.6	0	NÃO		1.8	78	24.0741	42	NÃO	1.04	92.7083		0.8	1.16	NÂO	NÂO	79	1466	NÃO	NÃO	NÃO	0	0
RNS	45	70	MASCULINO	BRANCA	EF INCOMPLETO	EX-TABAGISTA >6 meses		NÃO	NÃO	NÃO	NÃO	Sem DM	NÂO	NÃO	NÃO USA	NÃO	NENHUM	NÃO	NÃO	NÃO	TV	IAMCST	2	NÃO	11.9	10.9	11	0	NÃO		1.65	68	24.977	31	NÃO	1.31	50.4665	1.37	1.28	1.53	NÂO	NÂO	1489	1742	NÃO	NÃO	NÃO	0	0
MCP	46	71	FEMININO	BRANCA		NÂO TABAGISTA		NÃO	NÃO	NÃO	NÃO	Sem DM	NÂO	NÃO	NÃO USA	NÃO	NENHUM	NÃO	NÃO	NÃO	SINUSAL	IAMSST	2	NÃO	9.7	9.8	9.4	0	NÃO		1.5	78	34.6667	45	NÃO	0.93	68.3199	0.9	1.11	1.25	NÂO	SIM	768	768	NÃO	NÃO	NÃO	0	0
ERC	47	53	FEMININO	NEGRA	EF INCOMPLETO	TABAGISTA	40	SIM	NÃO	NÃO	SIM	AD ORAL	NÂO	SIM	SINVASTATI	SIM	1	SIM	NÃO	NÃO	SINUSAL	ANGI INSTÁVEL	1	NÃO	9	8.5	8.8	1	NÃO		1.65	94	34.5271	52	SIM	1.14	84.6893	0.96	0.92	1.17	NÂO	NÂO	80	80	NÃO	SIM	NÃO	0	0
RAS	48	77	MASCULINO	NEGRA	ALFABETO	TABAGISTA	100	SIM	NÃO	NÃO	NÃO	Sem DM	NÂO	NÃO	NÃO USA	NÃO	NENHUM	NÃO	NÃO	SIM	SINUSAL	IAMCST	1	NÃO	6.9	5.8	9	0	NÃO		1.6	60	23.4375	-	NÃO	1.26	41.6667	1.21	1.54	1.39	NÂO	NÂO	122	18670	NÃO	NÃO	NÃO	0	0
JSSR	49	74	FEMININO	NEGRA	EF INCOMPLETO	EX-TABAGISTA >6 meses	20	SIM	NÃO	NÃO	NÃO	Sem DM	NÂO	SIM	ATORVASTATI	SIM	1	NÃO	NÃO	NÃO	SINUSAL	IAMSST	1	NÃO	11.5	11.3	11.3	0	NÃO		1.65	67	24.6097	51	NÃO	1.69	30.89	1.61	1.94		NÂO	NÂO	1709	8696	NÃO	NÃO	NÃO	0	0
CAG	50	66	MASCULINO	BRANCA	EM COMPLETO	EX-TABAGISTA >6 meses		NÃO	NÃO	NÃO	NÃO	Sem DM	NÂO	SIM	SINVASTATI	NÃO	NENHUM	NÃO	NÃO	NÃO	SINUSAL	IAMCST	1	NÃO	9.8	9.3	8.1	0	SIM	ALTEPLASE	1.73	70	23.3887	50	NÃO	1.06	67.8721	1.12	0.95		NÂO	NÂO	8688	8688	NÃO	NÃO	NÃO	0	0
MARA	51	56	MASCULINO	BRANCA	SUPERIOR COMPLETO	EX-TABAGISTA >6 meses	60	SIM	SIM	SIM	SIM	INSULI	SIM	SIM	ATORVASTATI	SIM	1	SIM	NÃO	NÃO		ANGI INSTÁVEL	2	NÃO	13.3	12.3		0	NÃO		1.82	83	25.0574	50	NÃO	6.96	13.9128	7.1	9.21		SIM	SIM	68	100	NÃO	NÃO	SIM	SIM	0
DJS	52	57	MASCULINO	BRANCA		TABAGISTA	80	NÃO	NÃO	NÃO	NÃO	Sem DM	NÂO	NÃO	NÃO USA	NÃO	NENHUM	NÃO	NÃO	NÃO	RIVA	IAMCST	1	NÃO	13	12.7	12.3	1	SIM	TNK	1.76	84	27.1178	48	NÃO	0.93	104.122	0.87	1.03		NÂO	NÂO	1430	6445	NÃO	NÃO	NÃO	0	0
JRAD	53	57	MASCULINO	BRANCA	EM COMPLETO	TABAGISTA	40	NÃO	NÃO	NÃO	NÃO	Sem DM	NÂO	SIM	NÃO USA	NÃO	NENHUM	NÃO	NÃO	NÃO	SINUSAL	IAMCST	1	NÃO			11.8	0	NÃO		1.7	74	25.6055	43	NÃO	0.74	115.278	0.85	1.07	0.85	SIM	SIM	6008	5419	NÃO	NÃO	NÃO	0	0
JBTS	54	49	MASCULINO	NEGRA	EM COMPLETO	NÂO TABAGISTA		NÃO	NÃO	NÃO	NÃO	Sem DM	NÂO	NÃO	NÃO USA	NÃO	NENHUM	NÃO	NÃO	NÃO		IAMCST	1	NÃO	16	16		0	NÃO		1.6	68	26.5625	-	NÃO	1.13	76.057	1.19			NÂO	NÂO	36	268	NÃO	NÃO	NÃO	0	0
SL	55	51	MASCULINO	BRANCA	EM COMPLETO	TABAGISTA	35	SIM	NÃO	NÃO	NÃO	Sem DM	NÂO	SIM	ATORVASTATI	NÃO	NENHUM	NÃO	NÃO	NÃO	SINUSAL	IAMSST	2	NÃO	17.4	15.9		1	NÃO		1.95	113	29.7173	-	NÃO	0.9	155.201	0.95			NÂO	NÂO	36	458	NÃO	NÃO	NÃO	0	0
MMP	56	66	MASCULINO	BRANCA	EM COMPLETO	TABAGISTA	50	NÃO	NÃO	NÃO	NÃO	Sem DM	NÂO	NÃO	NÃO USA	NÃO	NENHUM	NÃO	NÃO	NÃO	SINUSAL	IAMCST	1	NÃO	14.6	12.1	12.7	0	NÃO		1.65	67	24.6097	55	NÃO	1.12	61.4831	1.15	1.24	1.37	NÂO	NÂO	2236	2951	NÃO	NÃO	NÃO	0	0
HSR	57	52	MASCULINO	NEGRA	EF INCOMPLETO	NÂO TABAGISTA		NÃO	NÃO	NÃO	NÃO	Sem DM	NÂO	NÃO	NÃO USA	NÃO	NENHUM	NÃO	NÃO	NÃO	SINUSAL	IAMCST	1	NÃO	15.9	15.3	14.8	0	SIM	TNK	1.75	110	35.9184	45	NÃO	0.91	147.741	0.74	0.94		NÂO	NÂO	3350	3350	NÃO	NÃO	NÃO	0	0
VIM	58	63	FEMININO	NEGRA	EF INCOMPLETO	TABAGISTA	50	NÃO	NÃO	NÃO	NÃO	Sem DM	NÂO	NÃO	NÃO USA	NÃO	NENHUM	NÃO	NÃO	NÃO	FV	IAMCST	1	SIM	15	13.5	11.6	0	SIM	TNK	1.6	70	27.3437	55	NÃO	0.78	81.5794		0.6	0.7	NÂO	NÂO	371	4627	NÃO	NÃO	NÃO	0	0
MFR	59	82	FEMININO	BRANCA	EF INCOMPLETO	NÂO TABAGISTA		SIM	NÃO	NÃO	SIM	AD ORAL	NÂO	SIM	SINVASTATI	NÃO	NENHUM	NÃO	NÃO	NÃO	SINUSAL	IAMSST	1	SIM	8.8	7.1	6.8	1	NÃO		1.4	66	33.6735	55	NÃO	1.19	37.9762	1.19	1.52	2.89	SIM	SIM	263	2646	NÃO	SIM	SIM	SIM	SIM
MPR	60	49	FEMININO	NEGRA	EF INCOMPLETO	EX-TABAGISTA >6 meses	20	SIM	NÃO	NÃO	NÃO	Sem DM	NÂO	SIM	ATORVASTATI	NÃO	NENHUM	NÃO	NÃO	NÃO	SINUSAL	IAMCST	1	NÃO	15.4	14.7	14.7	0	SIM	TNK	1.73	109	36.4195	40	NÃO	0.8	146.374	0.73	0.77	1.85	NÂO	SIM	3466	6614	NÃO	NÃO	NÃO	0	0
SAN	61	57	FEMININO	NEGRA	EM COMPLETO	EX-TABAGISTA >6 meses	20	SIM	NÃO	NÃO	NÃO	Sem DM	NÂO	NÃO	NÃO USA	NÃO	NENHUM	NÃO	NÃO	NÃO	SINUSAL	IAMCST	4	SIM	12.2	11	10.9	0	NÃO		1.6	82	32.0312	-	NÃO	1.15	69.8684	0.93	1.11	0.75	NÂO	NÂO	127	4189	NÃO	NÃO	NÃO	0	0
SLLS	62	65	MASCULINO	BRANCA	ES COMPLETO	TABAGISTA	53	SIM	NÃO	NÃO	NÃO	Sem DM	NÂO	SIM	SINVASTATI	NÃO	NENHUM	NÃO	NÃO	NÃO	SINUSAL	IAMSST	1	NÃO	16.2	15.4	15.8	0	NÃO		1.66	65	23.5883	-	NÃO	0.72	94.0394	0.79	0.75	0.81	NÂO	NÂO	91	1096	NÃO	NÃO	NÃO	0	0
MPR	63	72	MASCULINO	NEGRA		EX-TABAGISTA >6 meses	15	SIM	NÃO	NÃO	SIM	AD ORAL	NÂO	SIM	SINVASTATI	NÃO	NENHUM	NÃO	NÃO	NÃO	SINUSAL	IAMCST	1	NÃO	13	11	10	0	SIM	TNK	1.55	60	24.974	60	NÃO	0.8	70.8333	0.71	0.69	0.68	NÂO	NÂO	1896	3427	NÃO	NÃO	NÃO	0	0
LSS	64	70	MASCULINO	BRANCA	EF INCOMPLETO	EX-TABAGISTA >6 meses	60	SIM	NÃO	NÃO	SIM	AD ORAL	NÂO	SIM	SINVASTATI	NÃO	NENHUM	NÃO	NÃO	NÃO	SINUSAL	IAMSST	1	NÃO	13.6	14.7	11.9	1	NÃO		1.8	106	32.716	65	NÃO	1.49	69.1648	1.23	1.26		NÂO	NÂO			NÃO	NÃO	NÃO	0	0
CAA	65	58	MASCULINO	BRANCA	EM COMPLETO	TABAGISTA		SIM	NÃO	NÃO	NÃO	Sem DM	NÂO	SIM		SIM	1	SIM	NÃO	NÃO	SINUSAL	IAMCST	1	NÃO	14.7	11.9		0	NÃO		1.72	80	27.0416	46	NÃO	1.07	85.1506	1.26			NÂO	NÂO			NÃO	NÃO	NÃO	0	0
LGF	66	55	FEMININO	NEGRA	EF INCOMPLETO	NÂO TABAGISTA		SIM	SIM	NÃO	SIM	INSULI	SIM	SIM	SINVASTATI	NÃO	NENHUM	NÃO	NÃO	NÃO	SINUSAL	IAMCST	1	NÃO	11	10.8	10.6	0	NÃO		1.6	78	30.4687	45	NÃO	3.06	25.5787	4.42	3.09	2.25	SIM	SIM	22200	22200	NÃO	NÃO	NÃO	0	0
PLB	67	62	MASCULINO	NEGRA		NÂO TABAGISTA		SIM	NÃO	NÃO	NÃO	Sem DM	NÂO	NÃO	NÃO USA	NÃO	NENHUM	NÃO	NÃO	NÃO	SINUSAL	IAMCST	1	NÃO	15.3	15.3		0	NÃO		1.7	86	29.7578	37	NÃO	0.78	119.444		1.15	0.85	SIM	SIM	10189	10189	NÃO	NÃO	NÃO	0	0
AAS	68	43	MASCULINO	NEGRA	EF COMPLETO	NÂO TABAGISTA		SIM	NÃO	NÃO	NÃO	Sem DM	NÂO	NÃO	NÃO USA	NÃO	NENHUM	NÃO	NÃO	NÃO	SINUSAL	IAMSST	1	NÃO	14.6	14.4	14.2	0	NÃO		1.68	62	21.9671	60	NÃO	0.66	126.557	0.77	0.62	0.72	NÂO	NÂO	40	123	NÃO	NÃO	NÃO	0	0
JESM	69	73	MASCULINO	BRANCA	EM COMPLETO	TABAGISTA	176	NÃO	NÃO	NÃO	NÃO	Sem DM	NÂO	NÃO	NÃO USA	NÃO	NENHUM	NÃO	NÃO	NÃO	SINUSAL	IAMCST	1	NÃO	16.6	15.6	16.4	0	NÃO		1.6	55	21.4844	40	NÃO	1.48	34.5815	1.48	1.51	2.12	NÂO	SIM	3216	4893	NÃO	NÃO	NÃO	0	0
ADP	70	68	MASCULINO	NEGRA	EF INCOMPLETO	NÂO TABAGISTA		SIM	SIM	SIM	NÃO	Sem DM	NÂO	NÃO	NÃO USA	NÃO	NENHUM	NÃO	NÃO	NÃO	SINUSAL	IAMCST	4	SIM	7.12	6.1	8	0	NÃO		1.65	70	25.7117	44	SIM	3.33	21.021	4.87		5.05	SIM	SIM	138	509	NÃO	SIM	NÃO	0	1
JNS	71	51	MASCULINO	BRANCA		TABAGISTA	45	NÃO	NÃO	NÃO	NÃO	Sem DM	NÂO	NÃO	NÃO USA	NÃO	NENHUM	NÃO	NÃO	NÃO	SINUSAL	IAMCST	1	NÃO				0	NÃO	TNK	1.75	85	27.7551	65	NÃO	0.87	120.769	0.89	0.82		NÂO	NÂO	11	1776	NÃO	NÃO	NÃO	0	0
MACH	72	81	MASCULINO	BRANCA	EF INCOMPLETO	TABAGISTA	53	SIM	NÃO	NÃO	NÃO	Sem DM	NÂO	NÃO	NÃO USA	SIM	1	SIM	NÃO	NÃO	SINUSAL	IAMSST	1	NÃO	13.3	13.1	12.9	2	NÃO		1.7	84	29.0657	52	NÃO	0.99	69.5286	1.8	1.62	1.42	SIM	SIM	15	33	NÃO	NÃO	NÃO	0	0
JSC	73	62	MASCULINO	BRANCA	EF COMPLETO	TABAGISTA	35	NÃO	NÃO	NÃO	NÃO	Sem DM	NÂO	NÃO	NÃO USA	SIM	1	NÃO	NÃO	NÃO	SINUSAL	IAMCST	4	SIM	15.9	15.8	15.7	0	SIM	TNK	1.75	58	18.9388	45	NÃO	0.95	66.1404	0.94	0.82	0.92	NÂO	NÂO	27924	27924	NÃO	NÃO	NÃO	0	0
ACQ	74	65	MASCULINO	BRANCA	EF INCOMPLETO	TABAGISTA	50	SIM	NÃO	NÃO	NÃO	Sem DM	NÂO	SIM	SINVASTATI	NÃO	NENHUM	NÃO	NÃO	NÃO	SINUSAL	IAMCST	1	NÃO	16.3	16.2	15	0	SIM	alteplase	1.65	73	26.8136	52	NÃO	0.97	78.3935	1.01	1.01		NÂO	NÂO	13241	22683	NÃO	NÃO	NÃO	0	0
FMMA	75	46	FEMININO	NEGRA	EF COMPLETO	TABAGISTA	10	NÃO	NÃO	NÃO	NÃO	Sem DM	NÂO	NÃO	NÃO USA	NÃO	NENHUM	NÃO	NÃO	NÃO	SINUSAL	IAMCST	1	NÃO	12	11.1	11.1	0	NÃO		1.58	66	26.4381	36	SIM	1.59	46.0639	1.52	1.55		NÂO	NÂO			NÃO	NÃO	NÃO	0	0
RCNV	76	53	MASCULINO	BRANCA	EM COMPLETO	TABAGISTA	1	NÃO	NÃO	NÃO	SIM	AD ORAL	NÂO	SIM	NÃO USA	NÃO	NENHUM	NÃO	NÃO	NÃO	SINUSAL	IAMSST	1	NÃO		15.6	15.5	7	NÃO		1.75	115	37.551	50	NÃO	0.74	187.782		0.93		SIM	SIM	35	189	NÃO	NÃO	NÃO	0	0
ES	77	70	MASCULINO	NEGRA	EM COMPLETO	NÂO TABAGISTA		SIM	NÃO	NÃO	NÃO	Sem DM	NÂO	SIM		NÃO	NENHUM	NÃO	NÃO	NÃO	SINUSAL	IAMSST	1	NÃO	15.3	14.8	14.6	1	NÃO		1.75	81	26.449	45	NÃO	2.8	28.125	2.4	2.55	3.31	NÂO	SIM	7729	10954	NÃO	NÃO	NÃO	0	0
MH	78	54	MASCULINO	BRANCA		TABAGISTA		SIM	NÃO	NÃO	NÃO	Sem DM	NÂO	SIM		NÃO	NENHUM	NÃO	NÃO	NÃO	SINUSAL	IAMSST	1	NÃO	16.1	14.8		0	NÃO		1.86	94	27.1708	-	NÃO	1.1	102.071	1.14	1.16		NÂO	NÂO	806	638	NÃO	NÃO	NÃO	0	0
FVC	79	54	MASCULINO	NEGRA	EF INCOMPLETO	TABAGISTA		SIM	NÃO	NÃO	SIM	AD ORAL	NÂO	SIM	ROSUVASTATI	SIM	3	SIM	NÃO	NÃO	SINUSAL	IAMSST	1	NÃO	15.4	15.1		1	NÃO		1.71	80	27.3588	68	NÃO	0.93	102.748	0.98	0.91		NÂO	NÂO	57	101	NÃO	NÃO	NÃO	0	0
SAS	80	60	MASCULINO	BRANCA	EM INCOMPLETO	EX-TABAGISTA >6 meses		SIM	NÃO	NÃO	SIM	AD ORAL	NÂO	SIM	ATORVASTATI	SIM	>3	SIM	SIM	NÃO	FLUTTER	IAMSST	1	NÃO	13	13.1	12.9	11	NÃO		1.68	81	28.699	35	SIM	2.27	39.6476	2.03	2.2	1.82	NÂO	NÂO	377	377	NÃO	NÃO	NÃO	0	0
JTF	81	77	MASCULINO	NEGRA	EF INCOMPLETO	NÂO TABAGISTA		SIM	NÃO	NÃO	NÃO	Sem DM	NÂO	NÃO	NÃO USA	NÃO	NENHUM	NÃO	NÃO	NÃO	SINUSAL	ANGI INSTÁVEL	1	NÃO	12.1	13.3	11.7	20	NÃO		1.75	82	26.7755	58	NÃO	1.47	48.8095	1.85	1.73		SIM	SIM	36	36	NÃO	NÃO	NÃO	0	0
JK	82	41	MASCULINO	BRANCA		NÂO TABAGISTA			NÃO	NÃO	NÃO	Sem DM	NÂO	NÃO	NÃO USA	NÃO	NENHUM	NÃO	NÃO	NÃO	SINUSAL	IAMSST	1	NÃO	14.5		14.1	0	NÃO		1.75	100	32.6531	-	NÃO	1.09	126.147		1.17		NÂO	NÂO	23	103	NÃO	NÃO	NÃO	0	0
WMS	83	85	FEMININO	BRANCA	EF INCOMPLETO	NÂO TABAGISTA		SIM	NÃO	NÃO	NÃO	Sem DM	NÂO	SIM	SINVASTATI	SIM	1	NÃO	NÃO	NÃO	SINUSAL	IAMSST	1	NÃO	13.9	12.6	11.3	1	NÃO		1.63	85	31.9922	62	NÃO	0.98	56.3173			0.93	NÂO	NÂO	137	234	NÃO	NÃO	NÃO	0	0
JMB	89	75	MASCULINO	BRANCA	EM COMPLETO	NÂO TABAGISTA		SIM	NÃO	NÃO	SIM	INSULI	SIM	SIM	SINVASTATI	NÃO	NENHUM	NÃO	NÃO	NÃO	SINUSAL	IAMCST	1	NÃO	14.6	15.3	14.5	1	NÃO		1.6	64	25	67	NÃO	0.99	58.3614	1.07	1.07	1.11	NÂO	NÂO			NÃO	NÃO	NÃO	0	0
MAS	90	76	FEMININO	BRANCA	EM COMPLETO	NÂO TABAGISTA		SIM	NÃO	NÃO	NÃO	Sem DM	NÂO	SIM	SINVASTATI	NÃO	NENHUM	NÃO	NÃO	NÃO	SINUSAL	IAMSST	1	SIM	9.3	8.7	7.5	1	NÃO		1.57	65	26.3702	-	NÃO	2.34	20.9877	3.27	4.51	5.86	SIM	SIM	220	271	NÃO	NÃO	SIM	SIM	0
JRNS	91	58	MASCULINO	AMARELA	EM COMPLETO	EX-TABAGISTA >6 meses	80	SIM	NÃO	NÃO	SIM	AD ORAL	NÂO	NÃO	NÃO USA	NÃO	NENHUM	NÃO	NÃO	NÃO	SINUSAL	IAMSST	1	NÃO	16.2	15.1	14.7	2	NÃO		1.7	96	33.218	66	NÃO	1.28	85.4167	1.46	1.65	1.23	SIM	SIM	83	94	NÃO	NÃO	NÃO	0	0
MJS	92	62	FEMININO	NEGRA	EF INCOMPLETO	NÂO TABAGISTA		SIM	NÃO	NÃO	NÃO	Sem DM	NÂO	SIM		NÃO	NENHUM	NÃO	NÃO	NÃO	SINUSAL	IAMCST	1	NÃO	12.8	13.4		1	NÃO		1.6	61	23.8281	-	NÃO	0.67	83.8371	0.93			SIM	SIM	18	102	NÃO	SIM	NÃO	0	SIM
ODM	93	61	MASCULINO	BRANCA	EM COMPLETO	NÂO TABAGISTA		SIM	SIM	SIM	SIM	INSULI	SIM	SIM	SINVASTATI	SIM	>3	SIM	SIM	NÃO	SINUSAL	IAMSST	1	NÃO	9	11.5		1	NÃO		1.75	97	31.6735	39	NÃO	8.38	12.7005	6.5			NÂO	NÂO			NÃO	NÃO	NÃO	0	0
RA	94	59	FEMININO	BRANCA	EF INCOMPLETO	NÂO TABAGISTA		SIM	SIM	NÃO	SIM	NÃO USA	NÂO	NÃO	NÃO USA	NÃO	NENHUM	NÃO	NÃO	NÃO	SINUSAL	IAMCST	4	SIM	13	12	12.4	1	NÃO		1.55	70	29.1363	-	NÃO	0.78	85.8173	0.69	0.93	5.4	NÂO	SIM	2451	2451	NÃO	NÃO	NÃO	0	0
JMB	96	75	MASCULINO	BRANCA	EM COMPLETO	NÂO TABAGISTA		SIM	NÃO	NÃO	SIM	INSULI	SIM	SIM	SINVASTATI	NÃO	NENHUM	NÃO	NÃO	NÃO	SINUSAL	IAMSST	1	NÃO	14.3	14.6	15.3	3	NÃO		1.6	64	25	67	NÃO	0.99	58.3614	1.07	1.07	1.11	NÂO	NÂO			NÃO	NÃO	NÃO	0	0
MAS	97	76	FEMININO	BRANCA	EM COMPLETO	NÂO TABAGISTA		SIM	NÃO	NÃO	NÃO	Sem DM	NÂO	SIM	SINVASTATI	NÃO	NENHUM	NÃO	NÃO	NÃO	SINUSAL	IAMCST	1	SIM	9.3	8.7	7.5	0	NÃO		1.57	65	26.3702	-	NÃO	2.44	20.1275	3.27	4.51	5.86	SIM	SIM	220		NÃO	NÃO	SIM	SIM	0
MLP	98	72	FEMININO	BRANCA	EF COMPLETO	TABAGISTA			NÃO	NÃO	NÃO	Sem DM	NÂO	NÃO	NÃO USA	NÃO	NENHUM	NÃO	NÃO	NÃO	SINUSAL	IAMSST	1						NÃO		1.53	46	19.6506	-	NÃO	1.09	33.8787				NÂO	NÂO			NÃO	NÃO	NÃO	0	0
AAF	99	66	MASCULINO	BRANCA	SUPERIOR COMPLETO	EX-TABAGISTA >6 meses	40	SIM	NÃO	NÃO	NÃO	Sem DM	NÂO	SIM	NÃO USA	NÃO	NENHUM	NÃO	NÃO	SIM	SINUSAL	IAMCST	1	NÃO	13	13.5	13.6	0	NÃO		1.79	80	24.968	-	NÃO	1.2	68.5185	1.24	1.26	1.33	NÂO	NÂO	1684	1684	NÃO	NÃO	NÃO	0	0
JFA	100	66	FEMININO	BRANCA	SUPERIOR COMPLETO	NÂO TABAGISTA		SIM	NÃO	NÃO	SIM	NÃO USA	NÂO	SIM	NÃO USA	SIM	1	SIM	NÃO	NÃO	SINUSAL	IAMSST	1	NÃO	13.7	12.9	13.3	0	NÃO		1.75	80	26.1224	-	NÃO	1.88	37.1749		2.02	1.93	NÂO	NÂO	298	298	NÃO	NÃO	NÃO	0	0
MAAP	101	53	MASCULINO	BRANCA	EM COMPLETO	TABAGISTA	10	NÃO	NÃO	NÃO	NÃO	Sem DM	NÂO	NÃO	NÃO USA	NÃO	NENHUM	NÃO	NÃO	NÃO	SINUSAL	IAMSST	1	NÃO	15.4	15.5	15	2	NÃO		1.65	87	31.9559	-	NÃO	0.85	123.676	0.73	0.74		NÂO	NÂO	136	441	NÃO	NÃO	NÃO	0	0
EPG	102	66	MASCULINO	BRANCA		TABAGISTA	100		NÃO	NÃO	SIM	INSULI	SIM	NÃO	NÃO USA	SIM	2	NÃO	NÃO	NÃO	SINUSAL	IAMSST	1	NÃO	12.5	12.6	13.5	1	NÃO		1.66	64	23.2254	53	NÃO	0.83	79.2503	0.85	0.64		NÂO	NÂO	503	519	NÃO	NÃO	NÃO	0	0
FJA	103	46	MASCULINO	NEGRA	EF INCOMPLETO	TABAGISTA	60	NÃO	NÃO	NÃO	NÃO	Sem DM	NÂO	NÃO	NÃO USA	NÃO	NENHUM	NÃO	NÃO	NÃO	SINUSAL	IAMCST	1	NÃO	15.8	15.5	16.2	1	SIM	TNK	1.6	78	30.4687	-	NÃO	0.8	127.292	0.91	0.9		NÂO	NÂO	5681	5681	NÃO	NÃO	NÃO	0	0
MCC	104	59	FEMININO	BRANCA	EF INCOMPLETO	TABAGISTA	9	NÃO	NÃO	NÃO	SIM	NÃO USA	NÂO	SIM		NÃO	NENHUM	NÃO	NÃO	NÃO	SINUSAL	IAMCST	1	NÃO	12.6	11.7		0	NÃO		1.6	74	28.9062	-	NÃO	0.89	79.5084	0.95			NÂO	NÂO	86	127	NÃO	NÃO	NÃO	0	0
GS	105	82	FEMININO	BRANCA	EF COMPLETO	NÂO TABAGISTA		SIM	NÃO	NÃO	NÃO	Sem DM	NÂO	NÃO	NÃO USA	NÃO	NENHUM	NÃO	NÃO	NÃO	SINUSAL	IAMSST	1	NÃO	12.4	12.6	12.2	1	NÃO		1.62	75	28.578	63	NÃO	0.78	65.8387	0.67	0.7		NÂO	NÂO	132	493	NÃO	NÃO	NÃO	0	0
IRSJ	106	67	MASCULINO	BRANCA	SUPERIOR COMPLETO	TABAGISTA		SIM	NÃO	NÃO	NÃO	Sem DM	NÂO	SIM	ATORVASTATI	SIM	2	NÃO	SIM	NÃO	SINUSAL	IAMSST	1	NÃO	13.4	12.8		1	NÃO		1.68	69	24.4473	25	SIM	0.75	93.2778	0.96	0.86	0.82	SIM	SIM	22	566	NÃO	NÃO	NÃO	0	0
FSOA	107	34	MASCULINO	NEGRA		NÂO TABAGISTA		NÃO	NÃO	NÃO	SIM	AD ORAL	NÂO	NÃO	NÃO USA	NÃO	NENHUM	NÃO	NÃO	NÃO	SINUSAL	ANGI INSTÁVEL	1	NÃO	16.6	15.7		1	NÃO		1.88	114	32.2544	-	NÃO	0.97	173.024	1.09			NÂO	NÂO	4	13	NÃO	NÃO	NÃO	0	0
AFSR	108	64	FEMININO	BRANCA	EF COMPLETO	NÂO TABAGISTA		SIM	NÃO	NÃO	NÃO	Sem DM	NÂO	NÃO	NÃO USA	SIM	1	SIM	NÃO	NÃO	SINUSAL	ANGI INSTÁVEL	1	NÃO		12.3	12.4	2	NÃO		1.57	76	30.8329	41	SIM	1.82	37.4664	1.75			NÂO	NÂO	35	35	NÃO	NÃO	NÃO	0	0
IVMO	109	54	FEMININO	NEGRA	EF INCOMPLETO	TABAGISTA	41	SIM	NÃO	NÃO	NÃO	Sem DM	NÂO	NÃO	NÃO USA	NÃO	NENHUM	NÃO	NÃO	NÃO	SINUSAL	IAMSST	1	SIM	14.7	11.1	9.2	1	NÃO		1.56	80	32.8731	48	NÃO	0.69	117.713	1.01		0.43	SIM	SIM	3208	17777	NÃO	NÃO	NÃO	0	0
JGV	110	67	MASCULINO	BRANCA	SUPERIOR COMPLETO	EX-TABAGISTA >6 meses	80	NÃO	NÃO	NÃO	NÃO	Sem DM	NÂO	NÃO	NÃO USA	NÃO	NENHUM	NÃO	NÃO	NÃO	SINUSAL	IAMSST	1	NÃO	15.8	14.7	14.7	1	NÃO		1.72	56	18.9292	70	NÃO	0.85	66.7974	1.26	1.03	0.71	SIM	SIM	518	795	NÃO	NÃO	NÃO	0	0
ADS	112	59	MASCULINO	BRANCA	EM COMPLETO	TABAGISTA	30	NÃO	NÃO	NÃO	NÃO	Sem DM	NÂO	NÃO	NÃO USA	NÃO	NENHUM	NÃO	NÃO	NÃO	SINUSAL	IAMSST	1	NÃO	12.8	12.5			NÃO		1.71	100	34.1986	-	NÃO	1.08	104.167				NÂO	NÂO			NÃO	NÃO	NÃO	0	0
HC	113	72	MASCULINO	BRANCA		TABAGISTA	60	NÃO	NÃO	NÃO	NÃO	Sem DM	NÂO	NÃO	NÃO USA	NÃO	NENHUM	NÃO	NÃO	NÃO	SINUSAL	IAMCST	1	NÃO	16.7	15.3	15.2	0	NÃO		1.8	85	26.2346	-	NÃO	1.31	61.2807	0.97	1.11	1.51	NÂO	NÂO	33	1354	NÃO	NÃO	NÃO	0	0
SC	114	60	MASCULINO	BRANCA	EF COMPLETO	TABAGISTA		SIM	NÃO	NÃO	NÃO	Sem DM	NÂO	NÃO	NÃO USA	NÃO	NENHUM	NÃO	NÃO	NÃO	SINUSAL	IAMSST	1	NÃO	16	14.6	13.7	1	NÃO		1.65	72	26.4463	-	NÃO	1.6	50	1.09	1.07	1.18	NÂO	NÂO	752	752	NÃO	NÃO	NÃO	0	0
LMJ	115	56	MASCULINO	BRANCA	SUPERIOR COMPLETO	TABAGISTA	40	NÃO	NÃO	NÃO	NÃO	Sem DM	NÂO	NÃO	NÃO USA	NÃO	NENHUM	NÃO	NÃO	NÃO	FV	IAMCST	1	SIM	14.9	14.7	13.9	0	NÃO		1.78	70	22.0932	55	NÃO	0.78	104.701	0.79	0.76	0.98	NÂO	SIM	2399	7192	NÃO	SIM	NÃO	0	0
ALS	116	70	MASCULINO	BRANCA	EF COMPLETO	EX-TABAGISTA >6 meses	30	SIM	NÃO	NÃO	NÃO	Sem DM	NÂO	NÃO	NÃO USA	NÃO	NENHUM	NÃO	NÃO	NÃO	SINUSAL	IAMCST	1	NÃO	16.4	17.7	15.9	1	NÃO		1.65	106	38.9348	23	SIM	0.89	115.793	0.84	0.81	1.07	NÂO	NÂO	3902	11605	NÃO	SIM	NÃO	0	0
APS	117	44	FEMININO	BRANCA	EM COMPLETO	TABAGISTA	6	SIM	NÃO	NÃO	NÃO	Sem DM	NÂO	SIM		NÃO	NENHUM	NÃO	NÃO	NÃO	SINUSAL	IAMCST	1	NÃO	13.8	14	13.5	0	NÃO		1.55	68	28.3039	50	NÃO	0.8	96.3333	0.74	0.7	0.75	NÂO	NÂO	1226	1796	NÃO	NÃO	NÃO	0	0
SRF	118	60	FEMININO	BRANCA	EM COMPLETO	TABAGISTA		SIM	NÃO	NÃO	NÃO	Sem DM	NÂO	NÃO	NÃO USA	NÃO	NENHUM	NÃO	NÃO	NÃO	SINUSAL	IAMCST	1	NÃO	12.6		12.6	0	NÃO		1.51	72	31.5776	-	NÃO	0.71	95.7746			0.88	NÂO	NÂO	9762	9762	NÃO	NÃO	NÃO	0	0
NTJ	119	35	MASCULINO	NEGRA	EM COMPLETO	TABAGISTA	20	NÃO	NÃO	NÃO	NÃO	Sem DM	NÂO	NÃO	NÃO USA	NÃO	NENHUM	NÃO	NÃO	NÃO		IAMCST	1	NÃO	19	19	17.4	0	NÃO		1.82	90	27.1706	-	NÃO	0.87	150.862	0.8	0.83		NÂO	NÂO	27	17904	NÃO	NÃO	NÃO	0	0
FAM	120	76	MASCULINO	BRANCA	EM COMPLETO	NÂO TABAGISTA		NÃO	NÃO	NÃO	NÃO	Sem DM	NÂO	NÃO	NÃO USA	NÃO	NENHUM	NÃO	NÃO	NÃO	SINUSAL	IAMSST	1	NÃO	13	13	12.2	0	NÃO		1.53	60	25.6312	-	NÃO	0.87	61.3027	0.76	1.02		NÂO	NÂO	555	5165	NÃO	NÃO	NÃO	0	0
JRS	121	66	MASCULINO	BRANCA	EM COMPLETO	EX-TABAGISTA >6 meses	30	SIM	NÃO	NÃO	SIM	AD ORAL	NÂO	SIM	ATORVASTATI	SIM	1	SIM	NÃO	NÃO	FV	IAMCST	2	SIM	13.8	13.7	12.5	0	NÃO		1.7	70	24.2215	32	NÃO	1.31	54.9194	1.17	1.01	1.27	NÂO	NÂO	9	25655	NÃO	SIM	NÃO	0	0
PSK	122	65	MASCULINO	BRANCA	EF INCOMPLETO	NÂO TABAGISTA		SIM	NÃO	NÃO	SIM	AD ORAL	NÂO	NÃO	NÃO USA	NÃO	NENHUM	NÃO	NÃO	NÃO		IAMCST	2	SIM	14.8	15.7	14.7	7	NÃO		1.65	71	26.079	50	NÃO	0.8	92.4479	1.12	1.04	0.95	SIM	SIM	134	1924	NÃO	NÃO	NÃO	0	0
MSLSB	123	61	FEMININO	NEGRA	SUPERIOR COMPLETO	EX-TABAGISTA <6 meses	10	NÃO	NÃO	NÃO	NÃO	Sem DM	NÂO	NÃO	NÃO USA	NÃO	NENHUM	NÃO	NÃO	NÃO		ANGI INSTÁVEL	1	NÃO	12.9	12.8	12.9	1	NÃO		1.56	66	27.1203	-	NÃO	0.89	69.162	0.87	0.99	0.88	NÂO	NÂO	41	31	NÃO	NÃO	NÃO	0	0
APR	124	46	MASCULINO	BRANCA	EM COMPLETO	EX-TABAGISTA >6 meses	16	SIM	SIM	NÃO	NÃO	Sem DM	NÂO	SIM	ATORVASTATI	NÃO	NENHUM	NÃO	NÃO	NÃO	SINUSAL	IAMSST	1	NÃO	14.4	14.1	13.7	1	NÃO		1.78	95	29.9836	47	NÃO	1.47	84.3726	1.35	1.35	1.58	NÂO	NÂO	1088	1101	NÃO	NÃO	NÃO	0	0
ABS	125	71	MASCULINO	NEGRA	ALFABETO	NÂO TABAGISTA		SIM	NÃO	NÃO	NÃO	Sem DM	NÂO	NÃO	NÃO USA	NÃO	NENHUM	NÃO	NÃO	NÃO	SINUSAL	ANGI INSTÁVEL	1	NÃO	13.9	13.4	13	2	NÃO		1.6	65	25.3906	-	NÃO	0.93	66.9803	1.01	1.01		NÂO	NÂO	10	183	NÃO	NÃO	NÃO	0	0
AAP	126	70	MASCULINO	BRANCA	EM COMPLETO	NÂO TABAGISTA		SIM	NÃO	NÃO	NÃO	Sem DM	NÂO	SIM	ROSUVASTATI	SIM	1	SIM	NÃO	NÃO	SINUSAL	ANGI INSTÁVEL	1	NÃO	15.5	15.1	14.1	5	NÃO		1.65	77	28.2828	40	NÃO	1.18	63.4416	1.16	1.08	1.02	NÂO	NÂO	35	22	NÃO	NÃO	NÃO	0	0
DSV	127	46	MASCULINO	BRANCA	EM COMPLETO	EX-TABAGISTA >6 meses	75	NÃO	NÃO	NÃO	NÃO	Sem DM	NÂO	NÃO	NÃO USA	NÃO	NENHUM	NÃO	NÃO	NÃO		IAMCST	1	NÃO	17.1	16.5		0	NÃO		1.79	104	32.4584	62	NÃO	0.87	156.066	0.9			NÂO	NÂO	2411	2411	NÃO	NÃO	NÃO	0	0
ESR	128	81	FEMININO	BRANCA	SUPERIOR COMPLETO	NÂO TABAGISTA		SIM	NÃO	NÃO	NÃO	Sem DM	NÂO	SIM	SINVASTATI	SIM	3	SIM	SIM	NÃO	SINUSAL	ANGI INSTÁVEL	1	NÃO	13.3	12.2	11.9	4	NÃO		1.54	50	21.0828	68	NÃO	0.81	42.9955	0.56	0.92		NÂO	NÂO	11	15	NÃO	NÃO	NÃO	0	0
RAT	129	60	FEMININO	BRANCA		TABAGISTA	40	NÃO	NÃO	NÃO	NÃO	Sem DM	NÂO	NÃO	NÃO USA	NÃO	NENHUM	NÃO	NÃO	NÃO	SINUSAL	IAMSST	1	NÃO	15.1		14.6	3	NÃO		1.57	61	24.7475	-	NÃO	0.6	96.0185		0.72		NÂO	NÂO	64	632	NÃO	NÃO	NÃO	0	0
JSBN	130	65	MASCULINO	NEGRA	SUPERIOR COMPLETO	NÂO TABAGISTA		NÃO	NÃO	NÃO	NÃO	Sem DM	NÂO	NÃO	NÃO USA	NÃO	NENHUM	NÃO	NÃO	SIM	SINUSAL	ANGI INSTÁVEL	1	NÃO	15.9			3	NÃO		1.62	85	32.3884	-	NÃO	1.16	76.329			0.94	NÂO	NÂO	25	25	NÃO	NÃO	NÃO	0	0
	131	57	MASCULINO	NEGRA	EM COMPLETO	TABAGISTA		SIM	NÃO	NÃO	SIM	NÃO USA	NÂO	SIM		NÃO	NENHUM	NÃO	NÃO	NÃO	SINUSAL	IAMCST	1	NÃO	13.3	13.1	12.1	1	NÃO		1.78	91	28.7211	35	NÃO	0.84	124.884	0.81	0.9		NÂO	NÂO	1116	1466	NÃO	NÃO	NÃO	0	0
JPS	132	66	MASCULINO	BRANCA		EX-TABAGISTA >6 meses	10	NÃO	NÃO	NÃO	NÃO	Sem DM	NÂO	SIM		NÃO	NENHUM	NÃO	NÃO	NÃO	SINUSAL	IAMCST	1	NÃO	10.5	11.5	13.1	0	NÃO		1.68	78	27.6361	-	NÃO	0.7	114.524	0.89	0.8	0.85	SIM	SIM			NÃO	NÃO	NÃO	0	0
HGM	133	61	FEMININO	NEGRA	EF INCOMPLETO	TABAGISTA	50	SIM	NÃO	NÃO	NÃO	Sem DM	NÂO	SIM		NÃO	NENHUM	NÃO	NÃO	NÃO	SINUSAL	IAMCST	1	NÃO	13	12.2		0	NÃO		1.52	47	20.3428	55	NÃO	1.41	31.088	0.95	0.97		NÂO	NÂO	26	578	NÃO	NÃO	NÃO	0	0
MMS	134	49	MASCULINO	NEGRA	EM COMPLETO	EX-TABAGISTA >6 meses	50	NÃO	NÃO	NÃO	NÃO	Sem DM	NÂO	NÃO	NÃO USA	NÃO	NENHUM	NÃO	NÃO	NÃO		IAMSST	1	NÃO	15	13.9	15.5	4	NÃO		1.7	80	27.6817	-	NÃO	1.07	94.4964	1.16	1.03		NÂO	NÂO	78	178	NÃO	NÃO	NÃO	0	0
AGSN	135	55	MASCULINO	BRANCA	SUPERIOR COMPLETO	EX-TABAGISTA >6 meses	50	NÃO	NÃO	NÃO	SIM	AD ORAL	NÂO	SIM	SINVASTATI	NÃO	NENHUM	NÃO	NÃO	NÃO	SINUSAL	ANGI INSTÁVEL	1	NÃO	12.4	12.8	12.8	7	NÃO		1.54	57	24.0344	78	NÃO	0.73	92.1804	0.68	0.66		NÂO	NÂO	49	88	NÃO	NÃO	NÃO	0	0
JCA	136	70	MASCULINO	BRANCA	SUPERIOR COMPLETO	NÂO TABAGISTA		SIM	SIM	SIM	SIM	AD ORAL	NÂO	SIM	SINVASTATI	NÃO	NENHUM	NÃO	NÃO	NÃO	SINUSAL	IAMSST	1	NÃO	11.1	10.1	10	3	NÃO		1.7	81	28.0277	72	NÃO	5.9	13.3475	6.64	7.02		SIM	SIM	507	1035	NÃO	NÃO	NÃO	0	0
MAG	137	59	MASCULINO	BRANCA	SUPERIOR INCOMPLETO	EX-TABAGISTA >6 meses	50	SIM	NÃO	NÃO	NÃO	Sem DM	NÂO	SIM	SINVASTATI	SIM	1	SIM	NÃO	NÃO	SINUSAL	ANGI INSTÁVEL	1	NÃO	17.4	16.3	16.8	2	NÃO		1.76	90	29.0548	-	NÃO	0.86	117.733	0.87	1.02	0.88	NÂO	NÂO	10	3859	NÃO	NÃO	NÃO	0	0
APB	138	67	MASCULINO	BRANCA	EF INCOMPLETO	EX-TABAGISTA >6 meses	25	SIM	NÃO	NÃO	NÃO	Sem DM	NÂO	SIM	SINVASTATI	NÃO	NENHUM	NÃO	NÃO	NÃO	SINUSAL	ANGI INSTÁVEL	1	NÃO	13.5	13.4	13.8	1	NÃO		1.74	75	24.7721	61	NÃO	0.78	97.4893	0.88	0.92	0.87	NÂO	NÂO	27	43	NÃO	NÃO	NÃO	0	0
MBM	139	53	MASCULINO	NEGRA		TABAGISTA	35	SIM	NÃO	NÃO	NÃO	Sem DM	NÂO	NÃO	NÃO USA	SIM	>3	SIM	NÃO	NÃO	SINUSAL	ANGI INSTÁVEL	1	NÃO	15.8	15.8	16	0	NÃO		1.76	68	21.9525	47	NÃO	1.01	81.3531	0.8	0.74		NÂO	NÂO	6	17	NÃO	NÃO	NÃO	0	0
JF	140	49	MASCULINO	BRANCA	SUPERIOR COMPLETO	NÂO TABAGISTA		SIM	NÃO	NÃO	SIM	AD ORAL	NÂO	NÃO	NÃO USA	NÃO	NENHUM	NÃO	NÃO	NÃO	SINUSAL	IAMSST	1	NÃO	16.4	16.3	15.5	4	NÃO		1.65	75	27.5482	58	NÃO	0.64	148.112	0.63	0.65	0.62	NÂO	NÂO	35	440	NÃO	NÃO	NÃO	0	0
VRBDS	141	64	FEMININO	BRANCA	EF INCOMPLETO	NÂO TABAGISTA		NÃO	NÃO	NÃO	SIM	INSULI	SIM	SIM	SINVASTATI	NÃO	NENHUM	NÃO	NÃO	NÃO	SINUSAL	ANGI INSTÁVEL	2	NÃO	10.8	10.8	11.2	2	NÃO		1.6	59	23.0469	55	SIM	0.75	70.5815	0.58	0.77	0.69	NÂO	NÂO	22	22	NÃO	NÃO	NÃO	0	0
JRP	142	60	MASCULINO	NEGRA	EF COMPLETO	EX-TABAGISTA >6 meses	100	SIM	NÃO	NÃO	SIM	AD ORAL	NÂO	NÃO	NÃO USA	NÃO	NENHUM	NÃO	NÃO	NÃO		IAMSST	1	NÃO	16.1	15.6	15	14	NÃO		1.96	106	27.5927	55	NÃO	1.33	88.5547	1.62	1.17	1.35	NÂO	NÂO	62	62	NÃO	NÃO	NÃO	0	0
APS	143	56	MASCULINO	NEGRA		NÂO TABAGISTA		SIM	NÃO	NÃO	NÃO	Sem DM	NÂO	SIM		SIM	2	NÃO	SIM	NÃO	SINUSAL	IAMCST	1	NÃO			16.7	0	SIM	TNK	1.64	75	27.8852	-	NÃO	0.6	145.833			0.8	NÂO	SIM	2545		NÃO	NÃO	NÃO	0	0
SRG	144	53	MASCULINO	NEGRA	EF COMPLETO	NÂO TABAGISTA		SIM	NÃO	NÃO	NÃO	Sem DM	NÂO	SIM		NÃO	NENHUM	NÃO	NÃO	NÃO	SINUSAL	IAMCST	1	NÃO	18.6	18	16.9	0	NÃO		1.73	89	29.737	-	NÃO	1.18	91.137	1.06	1.27	1.18	NÂO	NÂO	418	2406	NÃO	NÃO	NÃO	0	0
CAC	145	57	MASCULINO	NEGRA	EM COMPLETO	EX-TABAGISTA >6 meses		SIM	NÃO	NÃO	NÃO	Sem DM	NÂO	NÃO	NÃO USA	NÃO	NENHUM	NÃO	NÃO	NÃO	SINUSAL	IAMCST	1	NÃO	16.7	17	16.1	0	SIM	TNK	1.7	86	29.7578	55	NÃO	0.93	106.601	0.81	0.86		NÂO	NÂO	1172	1172	NÃO	NÃO	NÃO	0	0
MHAR	146	66	FEMININO	NEGRA	EF INCOMPLETO	TABAGISTA	162	NÃO	NÃO	NÃO	NÃO	Sem DM	NÂO	NÃO	NÃO USA	NÃO	NENHUM	NÃO	NÃO	NÃO	SINUSAL	IAMCST	1	NÃO	13.4	14.8	14	0	NÃO		1.55	60	24.974	43	NÃO	0.83	63.1526	0.87	0.63	0.65	NÂO	NÂO	94	133	NÃO	NÃO	NÃO	0	0
NMMO	147	73	FEMININO	BRANCA	EF INCOMPLETO	EX-TABAGISTA >6 meses		SIM	NÃO	NÃO	NÃO	Sem DM	NÂO	SIM	SINVASTATI	NÃO	NENHUM	NÃO	NÃO	NÃO	SINUSAL	IAMCST	1	NÃO	13.2	12	11	0	NÃO		1.55	55	22.8928	-	NÃO	0.87	50.004	0.84	1.01		NÂO	NÂO	35	4906	NÃO	NÃO	NÃO	0	0
GST	148	64	MASCULINO	BRANCA	EF INCOMPLETO	TABAGISTA	50	NÃO	NÃO	NÃO	NÃO	Sem DM	NÂO	NÃO	NÃO USA	NÃO	NENHUM	NÃO	NÃO	NÃO	SINUSAL	IAMCST	1	NÃO	16.1	15.7	14.8	0	SIM	TNK	1.6	63	24.6094	27	NÃO	0.88	75.5682	0.85	0.85	0.91	NÂO	NÂO	12173	12173	NÃO	NÃO	NÃO	0	0
JGS	150	37	MASCULINO	NEGRA		TABAGISTA	81	SIM	NÃO	NÃO	NÃO	Sem DM	NÂO	NÃO	NÃO USA	NÃO	NENHUM	NÃO	NÃO	NÃO	SINUSAL	IAMCST	1	NÃO	16.6		14.1	0	NÃO		1.65	74	27.1809	-	NÃO	1.12	94.5188	0.98	0.85		NÂO	NÂO	1085	3975	NÃO	NÃO	NÃO	0	0
ALO	151	64	MASCULINO	NEGRA	EF COMPLETO	EX-TABAGISTA >6 meses	20	SIM	NÃO	NÃO	NÃO	Sem DM	NÂO	NÃO	NÃO USA	NÃO	NENHUM	NÃO	NÃO	NÃO	SINUSAL	IAMCST	1	NÃO	18.1	16.7	15.8	0	NÃO		1.65	84	30.854	44	NÃO	1.2	73.8889	0.94	1.15	0.96	NÂO	NÂO	53	7980	NÃO	NÃO	NÃO	0	0
VLB	152	72	MASCULINO	BRANCA	EM INCOMPLETO	EX-TABAGISTA >6 meses	40	NÃO	NÃO	NÃO	NÃO	Sem DM	NÂO	NÃO	NÃO USA	NÃO	NENHUM	NÃO	NÃO	NÃO	SINUSAL	IAMCST	1	NÃO	16.2	15.1	14.3	0	NÃO		1.78	60	18.937	39	NÃO	0.65	87.1795	0.7	0.7	0.88	NÂO	SIM	8247	8247	NÃO	SIM	NÃO	0	0
DEA	153	73	MASCULINO	NEGRA	SUPERIOR COMPLETO	TABAGISTA	50	NÃO	NÃO	NÃO	NÃO	Sem DM	NÂO	NÃO	NÃO USA	NÃO	NENHUM	NÃO	NÃO	NÃO	SINUSAL	IAMSST	2	NÃO	16	15.7	14.6	0	NÃO		1.8	100	30.8642	38	NÃO	0.96	96.9329	1.15	1.11	1.66	NÂO	SIM	39	4923	NÃO	NÃO	NÃO	0	0
LRD	154	63	MASCULINO	BRANCA		NÂO TABAGISTA		NÃO	NÃO	NÃO	NÃO	Sem DM	NÂO	SIM	SINVASTATI	SIM	1	NÃO	NÃO	NÃO	SINUSAL	IAMCST	1	NÃO	15.8	13.7	13.8	0	NÃO		1.69	74	25.9095	-	NÃO	0.83	95.3481	0.8	0.78	0.87	NÂO	NÂO	29	9709	NÃO	NÃO	NÃO	0	0
IM	155	62	MASCULINO	NEGRA		EX-TABAGISTA >6 meses		NÃO	NÃO	NÃO	NÃO	Sem DM	NÂO	NÃO	NÃO USA	NÃO	NENHUM	NÃO	NÃO	NÃO		IAMCST	1	NÃO	12.9	12.6	11.4	0	NÃO		1.6	70	27.3437	51	NÃO	1.07	70.8723	1.07	1.49	1.25	SIM	SIM	191	10345	NÃO	NÃO	NÃO	0	0
JOM	156	81	MASCULINO	BRANCA	EF INCOMPLETO	NÂO TABAGISTA		SIM	SIM	NÃO	SIM	AD ORAL	NÂO	SIM	ROSUVASTATI	NÃO	NENHUM	NÃO	NÃO	NÃO		IAMCST	1	SIM	12.3	12.7	11.7	0	NÃO		1.8	95	29.321	24	SIM	2.69	28.9395	3.49	5.68	3.76	SIM	SIM	2874	90317	NÃO	SIM	SIM	SIM	SIM
GSS	157	60	MASCULINO	NEGRA	EF COMPLETO	TABAGISTA		NÃO	NÃO	NÃO	NÃO	Sem DM	NÂO	NÃO	NÃO USA	NÃO	NENHUM	NÃO	NÃO	NÃO	SINUSAL	IAMSST	1	NÃO	14.9	14.5		1	NÃO		1.7	85	29.4118	-	NÃO	0.94	100.473	0.89			NÂO	NÂO	56	166	NÃO	NÃO	NÃO	0	0
LFMF	158	63	MASCULINO	BRANCA	SUPERIOR COMPLETO	EX-TABAGISTA >6 meses	60	SIM	NÃO	NÃO	SIM	AD ORAL	NÂO	SIM	SINVASTATI	NÃO	NENHUM	NÃO	NÃO	NÃO	SINUSAL	IAMSST	1	NÃO	14.2	13.8	12.4	1	NÃO		1.8	90	27.7778	65	NÃO	0.78	123.397	1.22	0.85	0.99	SIM	SIM	340	930	NÃO	NÃO	NÃO	0	0
ER	159	81	MASCULINO	BRANCA	SUPERIOR COMPLETO	NÂO TABAGISTA		SIM	NÃO	NÃO	NÃO	Sem DM	NÂO	NÃO	NÃO USA	NÃO	NENHUM	NÃO	NÃO	NÃO	SINUSAL	IAMCST	2	NÃO	15.6	14.7	14.1	0	NÃO		1.71	90	30.7787	-	NÃO	1.03	71.6019	1.96	2.08	1.99	SIM	SIM	17	27514	NÃO	NÃO	NÃO	0	0
VCSE	160	76	FEMININO	BRANCA	EF INCOMPLETO	TABAGISTA	25	SIM	NÃO	NÃO	NÃO	Sem DM	NÂO	NÃO	NÃO USA	NÃO	NENHUM	NÃO	NÃO	NÃO	SINUSAL	IAMCST	4	SIM	16.5	14.2	12.5	1	NÃO		1.5	68	30.2222	27	NÃO	0.85	60.4444	1.76	1.26	1.3	SIM	SIM	22	1513	NÃO	SIM	SIM	SIM	SIM
VJMS	161	81	MASCULINO	BRANCA	SUPERIOR COMPLETO	NÂO TABAGISTA		SIM	NÃO	NÃO	NÃO	Sem DM	NÂO	SIM	SINVASTATI	SIM	1	SIM	NÃO	NÃO	SINUSAL	ANGI INSTÁVEL	1	NÃO	15.5	14.9	11.8	2	NÃO		1.79	87	27.1527	47	SIM	0.98	72.7466	2.17	3.65	4.42	SIM	SIM	15	284	NÃO	NÃO	NÃO	0	0
ALPD	162	61	FEMININO	BRANCA	EM COMPLETO	TABAGISTA	40	SIM	NÃO	NÃO	NÃO	Sem DM	NÂO	SIM	SINVASTATI	SIM	2	SIM	NÃO	NÃO	SINUSAL	IAMSST	1	NÃO	14.6	13.6	13.6	2	NÃO		1.64	93	34.5776	38	NÃO	0.63	137.675	0.82	0.7	0.62	SIM	SIM	530	1823	NÃO	NÃO	NÃO	0	0
PA	163	52	MASCULINO	BRANCA	SUPERIOR COMPLETO	TABAGISTA		NÃO	NÃO	NÃO	NÃO	Sem DM	NÂO	NÃO	NÃO USA	NÃO	NENHUM	NÃO	NÃO	NÃO	SINUSAL	IAMSST	1	NÃO		16.2	17.1	4	NÃO		1.73	94	31.4077	-	NÃO	1.11	103.504	1.12	1.05		NÂO	NÂO	26	494	NÃO	NÃO	NÃO	0	0
MJR	164	55	FEMININO	BRANCA	EF INCOMPLETO	EX-TABAGISTA >6 meses		SIM	NÃO	NÃO	NÃO	Sem DM	NÂO	SIM	ATORVASTATI	SIM	3	NÃO	SIM	NÃO	SINUSAL	IAMCST	1	NÃO	16.8	14.4	14.3	0	NÃO		1.51	70	30.7004	41	SIM	0.86	81.678	0.86	0.83	1.32	NÂO	SIM	13	50	NÃO	NÃO	NÃO	0	0
LCS	165	60	MASCULINO	BRANCA	EF INCOMPLETO	NÂO TABAGISTA		NÃO	NÃO	NÃO	NÃO	Sem DM	NÂO	NÃO	NÃO USA	NÃO	NENHUM	NÃO	NÃO	NÃO	TV	IAMCST	2	SIM	13.3	14.2	13.9	3	NÃO		1.72	74	25.0135	28	NÃO	1.26	65.2557	1.99	2.12	2.66	SIM	SIM	347	14016	NÃO	SIM	NÃO	0	0
FFB	166	38	MASCULINO	BRANCA	EF INCOMPLETO	TABAGISTA		SIM	NÃO	NÃO	NÃO	Sem DM	NÂO	SIM	SINVASTATI	SIM	>3	SIM	NÃO	NÃO	SINUSAL	ANGI INSTÁVEL	1	NÃO		15.4		2	NÃO		1.64	63	23.4236	-	NÃO	1.19	75				NÂO	NÂO	19	21	NÃO	NÃO	NÃO	0	0
ASS	167	74	MASCULINO	NEGRA	EF INCOMPLETO	EX-TABAGISTA >6 meses	80	NÃO	NÃO	NÃO	NÃO	Sem DM	NÂO	SIM	SINVASTATI	NÃO	NENHUM	NÃO	NÃO	NÃO	SINUSAL	IAMCST	1	NÃO	14.1	14.8	13.4	1	SIM	TNK	1.69	65	22.7583	-	NÃO	0.82	72.6626	1.04	1.04	1	SIM	SIM			NÃO	NÃO	NÃO	0	0
FPA	168	65	MASCULINO	NEGRA		TABAGISTA	40	NÃO	NÃO	NÃO	SIM	NÃO USA	NÂO	NÃO	NÃO USA	NÃO	NENHUM	NÃO	NÃO	NÃO	SINUSAL	IAMCST	1	NÃO	15.3	14.9	14.2	0	SIM	TNK	1.6	63	24.6094	-	NÃO	0.96	68.3594				NÂO	NÂO	6538	2406	NÃO	NÃO	NÃO	0	0
DGM	169	69	MASCULINO	NEGRA		NÂO TABAGISTA		SIM	NÃO	NÃO	SIM	AD ORAL	NÂO	SIM	SINVASTATI	NÃO	NENHUM	NÃO	NÃO	NÃO	SINUSAL	IAMCST	1	NÃO	13.4			0	NÃO		1.71	110	37.6184	-	NÃO	2.5	43.3889				NÂO	NÂO	129	129	NÃO	NÃO	NÃO	0	SIM
APS	170	68	FEMININO	NEGRA	EF INCOMPLETO	NÂO TABAGISTA		SIM	NÃO	NÃO	SIM	AD ORAL	NÂO	SIM	ATORVASTATI	NÃO	NENHUM	NÃO	NÃO	NÃO	BAVT	IAMCST	1	NÃO	13.5	12.4	9.6	3	NÃO		1.55	60	24.974	40	SIM	1.45	35.1724	2.24	2.84	3.29	SIM	SIM	7234	12021	NÃO	SIM	SIM	SIM	SIM
FCR	173	62	MASCULINO	BRANCA	EM COMPLETO	NÂO TABAGISTA		NÃO	NÃO	NÃO	NÃO	Sem DM	NÂO	NÃO	NÃO USA	NÃO	NENHUM	NÃO	NÃO	NÃO	SINUSAL	IAMCST	1	NÃO	16.3	15.6	15.4	0	SIM	TNK	1.65	74	27.1809	-	NÃO	0.98	81.8027	0.91	1.01		NÂO	NÂO	2396	2396	NÃO	NÃO	NÃO	0	0
JCA	174	68	MASCULINO	BRANCA	EF INCOMPLETO	EX-TABAGISTA >6 meses	20	SIM	NÃO	NÃO	NÃO	Sem DM	NÂO	NÃO	NÃO USA	NÃO	NENHUM	NÃO	NÃO	NÃO	SINUSAL	IAMCST	1	NÃO			12.2	0	SIM	TNK	1.76	78	25.1808	-	NÃO	0.93	83.871		1.07		NÂO	NÂO			NÃO	NÃO	NÃO	0	0
MCGS	175	49	FEMININO	BRANCA	EM INCOMPLETO	EX-TABAGISTA >6 meses	37	NÃO	NÃO	NÃO	NÃO	Sem DM	NÂO	SIM		NÃO	NENHUM	NÃO	NÃO	NÃO	SINUSAL	IAMCST	1	NÃO	13.8	12.7		2	SIM	TNK	1.65	72	26.4463	-	NÃO	0.71	108.944	0.7			NÂO	NÂO	1331	1331	NÃO	NÃO	NÃO	0	0
TSO	176	74	FEMININO	BRANCA		NÂO TABAGISTA		SIM	NÃO	NÃO	SIM	INSULI	SIM	NÃO	NÃO USA	SIM	1	NÃO	SIM	NÃO	FA	ANGI INSTÁVEL	1	NÃO	12.1	11.5	10.4		NÃO		1.55	58	24.1415	36	SIM	1.17	38.6254	1.48	1.78	1.17	SIM	SIM	32	145	NÃO	NÃO	NÃO	0	0
CAS	177	49	MASCULINO	BRANCA	EF INCOMPLETO	TABAGISTA	48	NÃO	NÃO	NÃO	SIM	INSULI	SIM	NÃO	NÃO USA	NÃO	NENHUM	NÃO	NÃO	NÃO	SINUSAL	IAMSST	1	NÃO	17.8	17	16.3	2	NÃO		1.72	80	27.0416	-	NÃO	0.74	136.637	0.8	0.78		NÂO	NÂO	25	174	NÃO	NÃO	NÃO	0	0
PHT	178	66	MASCULINO	AMARELA	EM COMPLETO	EX-TABAGISTA >6 meses	25	SIM	NÃO	NÃO	SIM	AD ORAL	NÂO	SIM	SINVASTATI	NÃO	NENHUM	NÃO	NÃO	NÃO	SINUSAL	IAMCST	1	NÃO	16.3	15.9	16.1	0	NÃO		1.68	80	28.3447	40	NÃO	0.85	96.732	0.83	1		NÂO	NÂO	1777	1777	NÃO	NÃO	NÃO	0	0
RSQ	179	49	FEMININO	BRANCA		EX-TABAGISTA <6 meses	30	SIM	NÃO	NÃO	NÃO	Sem DM	NÂO	SIM		NÃO	NENHUM	NÃO	NÃO	NÃO	SINUSAL	ANGI INSTÁVEL	1	NÃO	14.4	14.1	13.9	1	NÃO		1.67	65	23.3067	-	NÃO	0.51	136.921	0.59	0.78	0.6	SIM	SIM	42	269	NÃO	NÃO	NÃO	0	0
ABS	180	78	FEMININO	BRANCA	EF INCOMPLETO	NÂO TABAGISTA		SIM	NÃO	NÃO	SIM	AD ORAL	NÂO	NÃO	NÃO USA	NÃO	NENHUM	NÃO	NÃO	NÃO	SINUSAL	IAMCST	1	SIM	13.2				NÃO		1.45	40	19.025	61	NÃO	0.91	32.1734				NÂO	NÂO			NÃO	SIM	NÃO	0	SIM
JSBN	181	69	MASCULINO	BRANCA	EF INCOMPLETO	EX-TABAGISTA >6 meses	35	SIM	NÃO	NÃO	SIM	INSULI	SIM	SIM	ATORVASTATI	SIM	2	SIM	SIM	NÃO	SINUSAL	ANGI INSTÁVEL	1	NÃO	14.7	14.3	14.8	5	NÃO		1.68	73	25.8645	68	NÃO	0.76	94.7186	0.99	0.86		SIM	SIM	7	55	NÃO	NÃO	NÃO	0	0
ALB	182	62	FEMININO	BRANCA	EF INCOMPLETO	NÂO TABAGISTA		SIM	SIM	SIM	NÃO	Sem DM	NÂO	NÃO	NÃO USA	NÃO	NENHUM	NÃO	NÃO	NÃO	SINUSAL	IAMSST	1	NÃO	8.6	7.7	7.2	5	NÃO		1.49	53	23.8728	-	NÃO	5.33	9.1565	5.87	6.28	6.86	SIM	SIM	248	846	NÃO	NÃO	SIM	SIM	0
OSL	183	66	MASCULINO	BRANCA	SUPERIOR COMPLETO	EX-TABAGISTA >6 meses		SIM	NÃO	NÃO	SIM	AD ORAL	NÂO	NÃO	NÃO USA	NÃO	NENHUM	NÃO	NÃO	NÃO	SINUSAL	IAMSST	1	NÃO	12.2	12	11.7	3	NÃO		1.7	72	24.9135	-	NÃO	0.75	98.6667	0.97	0.87		SIM	SIM	1373	1596	NÃO	NÃO	NÃO	0	0
IOPR	184	66	FEMININO	BRANCA	EF INCOMPLETO	TABAGISTA	100	SIM	NÃO	NÃO	NÃO	Sem DM	NÂO	NÃO	NÃO USA	NÃO	NENHUM	NÃO	NÃO	NÃO	SINUSAL	IAMCST	1	NÃO	14.1	12.4	11.1	0	SIM	alteplase	1.5	50	22.2222	55	NÃO	1.33	32.8425	0.94	0.68	1.02	NÂO	NÂO	77	1386	NÃO	NÃO	NÃO	0	0
PRBS	185	45	MASCULINO	NEGRA	EM COMPLETO	NÂO TABAGISTA		NÃO	NÃO	NÃO	NÃO	Sem DM	NÂO	SIM	ATORVASTATI	SIM	3	SIM	NÃO	NÃO	SINUSAL	ANGI INSTÁVEL	1	NÃO	13.4	12.5	12.7	1	NÃO		1.69	58	20.3074	56	NÃO	1.05	72.8836	0.89	0.71		NÂO	NÂO	6	36	NÃO	NÃO	NÃO	0	0
ACSC	186	52	MASCULINO	BRANCA		EX-TABAGISTA >6 meses	20	NÃO	NÃO	NÃO	NÃO	Sem DM	NÂO	NÃO	NÃO USA	NÃO	NENHUM	NÃO	NÃO	NÃO	SINUSAL	IAMSST	1	NÃO	15.9	15.5	15.8	0	NÃO		1.68	84	29.7619	-	NÃO	0.7	146.667	0.84	0.65		NÂO	NÂO	49	69	NÃO	NÃO	NÃO	0	0
JAA	187	61	MASCULINO	BRANCA	EF COMPLETO	TABAGISTA	67	NÃO	NÃO	NÃO	SIM	NÃO USA	NÂO	NÃO	NÃO USA	NÃO	NENHUM	NÃO	NÃO	NÃO	SINUSAL	IAMSST	1	NÃO	16	14.3	15	5	NÃO		1.69	99	34.6627	60	NÃO	1.11	97.8604	0.96	0.97		NÂO	NÂO	41	8898	NÃO	NÃO	NÃO	0	0
DFL	188	60	FEMININO	BRANCA	EF INCOMPLETO	TABAGISTA		SIM	NÃO	NÃO	NÃO	Sem DM	NÂO		NÃO USA	NÃO	NENHUM	NÃO	NÃO	NÃO	FA	IAMCST	2	SIM		12.3	12.5	0	NÃO		1.67	47	16.8525	-	NÃO	0.9	49.321	1.76	1.07	0.78	SIM	SIM	2994	2994	NÃO	NÃO	NÃO	0	0
IGN	189	53	MASCULINO	NEGRA	EF COMPLETO	TABAGISTA	30	NÃO	NÃO	NÃO	NÃO	Sem DM	NÂO	NÃO	NÃO USA	NÃO	NENHUM	NÃO	NÃO	NÃO	SINUSAL	IAMCST	1	NÃO	14	13.4		0	NÃO		1.68	90	31.8878	55	NÃO	0.91	119.505	0.87			NÂO	NÂO	23	4167	NÃO	NÃO	NÃO	0	0
HAC	190	69	FEMININO	BRANCA	EF INCOMPLETO	NÂO TABAGISTA		SIM	NÃO	NÃO	NÃO	Sem DM	NÂO	SIM	SINVASTATI	NÃO	NENHUM	NÃO	NÃO	NÃO		IAMSST	1	SIM	9.8	9.8	9.8	3	NÃO		1.6	65	25.3906	-	NÃO	1.63	33.4249	1.38	1.05	1.37	NÂO	NÂO	233	686	SIM	NÃO	SIM	SIM	SIM
DJLC	191	80	MASCULINO	BRANCA	SUPERIOR COMPLETO	NÂO TABAGISTA		SIM	NÃO	NÃO	NÃO	Sem DM	NÂO	SIM	SINVASTATI	SIM	NENHUM	NÃO	NÃO	SIM	SINUSAL	IAMCST	1	NÃO	9.8	9.4	9	0	NÃO		1.7	69	23.8754	-	SIM	0.94	61.1702	0.75	0.87	1.01	NÂO	NÂO	29	969	SIM	NÃO	NÃO	0	0
JCPR	192	53	MASCULINO	NEGRA	EF INCOMPLETO	EX-TABAGISTA >6 meses		SIM	NÃO	NÃO	NÃO	Sem DM	NÂO	SIM	ATORVASTATI	SIM	2	SIM	NÃO	NÃO	FA	ANGI INSTÁVEL	1	NÃO	11.3	11.1	11	3	NÃO		1.62	72	27.4348	24	SIM	1.61	54.0373	1.56	2.06	2.07	SIM	SIM	35	80	NÃO	NÃO	SIM	SIM	0
SCS	193	59	MASCULINO	BRANCA	EF INCOMPLETO	EX-TABAGISTA >6 meses	25	SIM	SIM	SIM	SIM	INSULI	SIM	NÃO	ATORVASTATI	SIM	1	SIM	NÃO	NÃO	SINUSAL	IAMCST	1	NÃO	14.4		14.4	0	NÃO		1.7	64	22.1453	-	NÃO	11.03	6.52765		8.24	12.32	NÂO	SIM	8221	34985	SIM	SIM	SIM	SIM	SIM
JCCA	194	58	MASCULINO	BRANCA	EF INCOMPLETO	EX-TABAGISTA >6 meses	40	SIM	NÃO	NÃO	SIM	INSULI	SIM	SIM	ATORVASTATI	SIM	2	SIM	NÃO	NÃO	FA	IAMSST	1	NÃO	14.6		13.2	3	NÃO		1.7	90	31.1419	-	NÃO	1.2	85.4167	1.68	1.33		SIM	SIM	6	12	NÃO	NÃO	NÃO	0	0
HHC	195	72	MASCULINO	BRANCA	EM COMPLETO	EX-TABAGISTA >6 meses	20	SIM	NÃO	NÃO	NÃO	Sem DM	NÂO	NÃO	NÃO USA	NÃO	NENHUM	NÃO	NÃO	NÃO	SINUSAL	IAMSST	1	NÃO	16.6	16.7	15.1	3	NÃO		1.66	73	26.4915	54	NÃO	0.85	81.1111	0.85			NÂO	NÂO	532	204	NÃO	NÃO	NÃO	0	0
JCPR	196	53	MASCULINO	NEGRA	EF COMPLETO	NÂO TABAGISTA		SIM	NÃO	NÃO	SIM	NÃO USA	NÂO	NÃO	NÃO USA	NÃO	NENHUM	NÃO	NÃO	NÃO	FA	ANGI INSTÁVEL	1	NÃO	11.9	11.7		7	NÃO		1.62	73	27.8159	24	SIM	1.52	58.0318	1.9	1.86	1.78	NÂO	NÂO	60	163	NÃO	NÃO	NÃO	0	0
MUM	197	79	FEMININO	BRANCA	SUPERIOR COMPLETO	NÂO TABAGISTA		SIM	NÃO	NÃO	SIM	AD ORAL	NÂO	SIM	SINVASTATI	NÃO	NENHUM	NÃO	NÃO	NÃO	SINUSAL	IAMSST	1	NÃO	7.8	7.3	7.6	2	NÃO					-	NÃO	3.2	0	3.89	5.16	6.67	SIM	SIM	2429	8329	SIM	NÃO	SIM	SIM	0
RRJ	198	59	MASCULINO	BRANCA	SUPERIOR COMPLETO	TABAGISTA		SIM	NÃO	NÃO	NÃO	Sem DM	NÂO	SIM	SINVASTATI	NÃO	NENHUM	NÃO	NÃO	NÃO	SINUSAL	IAMCST	1	NÃO	15.2	13.8		0	NÃO		1.77	90	28.7274	-	NÃO	1.13	89.6018	1.17			NÂO	NÂO	26	5147	NÃO	NÃO	NÃO	0	0
MSS	199	50	MASCULINO	BRANCA	SUPERIOR COMPLETO	TABAGISTA	30	SIM	NÃO	NÃO	NÃO	Sem DM	NÂO	NÃO	NÃO USA	NÃO	NENHUM	NÃO	NÃO	NÃO	SINUSAL	IAMCST	1	NÃO	17.5	15.9		0	NÃO		1.7	80	27.6817	-	NÃO	1.18	84.7458	1.08			NÂO	NÂO	28	6544	NÃO	NÃO	NÃO	0	0
MOS	200	64	FEMININO	NEGRA	EF INCOMPLETO	EX-TABAGISTA >6 meses	30	NÃO	NÃO	NÃO	SIM	NÃO USA	NÂO	NÃO	NÃO USA	NÃO	NENHUM	NÃO	NÃO	NÃO	SINUSAL	IAMCST	1	NÃO	13.7	12.5	12.8	0	NÃO		1.6	67	26.1719	-	NÃO	0.75	80.1519	0.84	0.82		NÂO	NÂO	168	1807	NÃO	NÃO	NÃO	0	0
WRO	201	65	MASCULINO	NEGRA	EF COMPLETO	EX-TABAGISTA >6 meses	40	NÃO	NÃO	NÃO	NÃO	Sem DM	NÂO	NÃO	NÃO USA	NÃO	NENHUM	NÃO	NÃO	NÃO	SINUSAL	IAMSST	1	NÃO	10.1	9.3	9.6	5	NÃO		1.62	60	22.8624	-	NÃO	1.21	51.6529	1.59			SIM	SIM	591	2446	NÃO	NÃO	NÃO	0	0
JFSA	202	55	MASCULINO	BRANCA	SUPERIOR COMPLETO	NÂO TABAGISTA		NÃO	NÃO	NÃO	NÃO	Sem DM	NÂO	NÃO	NÃO USA	NÃO	NENHUM	NÃO	NÃO	NÃO	SINUSAL	IAMCST	1	NÃO	17.1	15		0	NÃO		1.72	72	24.3375	55	NÃO	0.86	98.8372	0.82	0.83	0.89	NÂO	NÂO	36	1894	NÃO	NÃO	NÃO	0	0
EH	203	54	FEMININO	BRANCA	EM COMPLETO	NÂO TABAGISTA		SIM	NÃO	NÃO	NÃO	Sem DM	NÂO	SIM	SINVASTATI	SIM	1	NÃO	NÃO	NÃO	SINUSAL	IAMCST	1	NÃO	15.6	14.5		0	NÃO		1.87	89	25.4511	49	NÃO	0.75	120.48	0.72			NÂO	NÂO	1095	907	NÃO	NÃO	NÃO	0	0
IAS	204	60	FEMININO	BRANCA	EM COMPLETO	EX-TABAGISTA >6 meses	120	SIM	NÃO	NÃO	NÃO	Sem DM	NÂO	NÃO	NÃO USA	NÃO	NENHUM	NÃO	NÃO	NÃO	SINUSAL	IAMCST	1	NÃO	14.3	15.3		0	NÃO		1.55	70	29.1363	-	NÃO	0.68	97.2222	0.87			SIM	SIM	396	396	NÃO	NÃO	NÃO	0	0
OJC	205	63	MASCULINO	BRANCA	EF COMPLETO	NÂO TABAGISTA		SIM	NÃO	NÃO	SIM	AD ORAL	NÂO	NÃO	SINVASTATI	NÃO	NENHUM	NÃO	NÃO	NÃO	SINUSAL	IAMCST	1	NÃO	15.6	14.1	13.8	0	NÃO		1.76	61	19.6927	-	NÃO	1.12	58.2465	0.85	0.94		NÂO	NÂO	28	301	NÃO	NÃO	NÃO	0	0
BSM	206	37	MASCULINO	BRANCA		NÂO TABAGISTA		NÃO	NÃO	NÃO	NÃO	Sem DM	NÂO	NÃO	NÃO USA	NÃO	NENHUM	NÃO	NÃO	NÃO	SINUSAL	IAMCST	1	NÃO	17.8	16.4	16.1	1	NÃO		1.85	100	29.2184	72	NÃO	1.27	112.642	1.09	1.27	1.12	NÂO	NÂO	161	3636	NÃO	NÃO	NÃO	0	0
																																															19
[truncated: 34 more columns]

## Sheet: Legends Variable (English)
Variable (Portuguese)	Variable (English)	Description
Name	Name	Patient's name
ID	ID	Unique patient identifier
Idade	Age	Patient's age (years)
Sexo	Sex	Patient's biological sex (Male/Female)
Cor_da_pele	Skin color	Patient's self-reported skin color
Escolaridade	Education level	Patient's highest completed education level
Tabagismo	Smoking status	Current or past smoking habit (Yes/No)
Anos/Maço	Pack-years	Smoking exposure in pack-years
HAS	Hypertension (HTN)	History of systemic arterial hypertension
DRC	Chronic kidney disease (CKD)	Diagnosis of chronic kidney disease
DIALÍTICO	Dialysis	Whether the patient is on dialysis (Yes/No)
DM	Diabetes mellitus (DM)	Diagnosis of diabetes mellitus
TRATAMENTO_DM_II	Type 2 DM treatment	Current treatment for type 2 diabetes
DM-INS_DEP	Insulin-dependent DM	Whether the patient is insulin-dependent
Dislipidemia	Dyslipidemia	Diagnosis of dyslipidemia
Medicamento_para_Dislipidemia	Lipid-lowering medication	Use of medication for dyslipidemia
IAM_prévio	Previous MI	History of previous myocardial infarction
QUANTOS_IAMS_PRÉVIOS?	Number of previous MIs	Number of previous myocardial infarctions
ICP_prévia	Previous PCI	History of previous percutaneous coronary intervention
Revascularização_prévia	Previous revascularization	History of previous coronary artery bypass graft (CABG)
AVC_prévio	Previous stroke	History of previous cerebrovascular accident (CVA)
Ritmo_prévio_do_paciente	Previous heart rhythm	Patient's prior cardiac rhythm
Diagnóstico_de_SCA	ACS diagnosis	Acute coronary syndrome diagnosis
KILLIP	Killip classification	Killip classification at admission
USO_DE_DROGAS_VASOATIVAS	Use of vasoactive drugs	Whether vasoactive drugs were administered
Hb_mg/dl_Pré_exame	Pre-test Hemoglobin (mg/dL)	Hemoglobin level before the procedure
Hb_mg/dl_Pós_exame_24h	Post-test Hemoglobin 24h (mg/dL)	Hemoglobin level 24 hours after procedure
Hb_mg/dl_Pós_exame_48h	Post-test Hemoglobin 48h (mg/dL)	Hemoglobin level 48 hours after procedure
dias_entre_IAM_e_ICP	Days between MI and PCI	Number of days between myocardial infarction and percutaneous coronary intervention
Trombólise_	Thrombolysis	Whether thrombolysis was performed
Tipo_de_trombolítico	Type of thrombolytic agent	Type of thrombolytic medication used
Altura	Height	Patient's height (cm)
Peso	Weight	Patient's weight (kg)
IMC	BMI	Body Mass Index
FEVE_pré_ICP	LVEF pre-PCI	Left ventricular ejection fraction before PCI
IC__PRÉVIO	Previous heart failure	History of heart failure
SCr_(mg/dl)_pré/mais_recente	Baseline serum creatinine (mg/dL)	Most recent pre-procedure serum creatinine level
TFG	Glomerular filtration rate (GFR)	Estimated glomerular filtration rate
Scr_(mg/dl)Pós<24h_ou_menos	Post-procedure serum creatinine < 24h (mg/dL)	Serum creatinine level within 24 hours post-procedure
Scr_(mg/dl)Pós_48h	Post-procedure serum creatinine 48h (mg/dL)	Serum creatinine level 48 hours post-procedure
Scr_Pós_72h_a_5_DIAS_(mg/dl)	Post-procedure serum creatinine 72h-5 days (mg/dL)	Serum creatinine level between 72 hours and 5 days post-procedure
LRA_48h	AKI 48h	Acute kidney injury within 48 hours
LRA_IC	CI-AKI	Contrast induced Acute kidney injury
Tropo_T_ADMISSÃO	Troponin T on admission	Initial troponin T level at hospital admission
Pico_Tropo_T_	Peak troponin T	Highest troponin T level measured
PCR_NÃO_COVID_+_DURANTE_ICP	COVID-19 + during PCI	diagnostic (COVID-19)
PCR	Cardiac arrest	Whether the patient had a cardiac arrest
Diálise_EM_30_DIAS_PÓS_ICP	Dialysis within 30 days post-PCI	Need for dialysis within 30 days after PCI
FollowUp_1_Diálise	Follow-up 1 - Dialysis	Need for dialysis at first follow-up
FollowUp_1_Óbito	Follow-up 1 - Death	Death at first follow-up
FollowUp_1_Reinternação/PS	Follow-up 1 - Readmission/ER visit	Readmission or emergency room visit at first follow-up
Death	Death	Patient's death
Data_da_ICP	PCI date	Date of percutaneous coronary intervention
DATA_DO_ÓBITO	Date of death	Date of patient's death
Dias_até_o_óbito	Days until death	Number of days between procedure and death
Mehran2-Total	Mehran2 Total Score	Total risk score in Mehran2 model
Mehran 2-Hipotensão	Mehran 2 Hypotension	Hypotension in original Mehran 2 risk model
Mehran2-TFG	Mehran 2 GFR	Glomerular filtration rate in original Mehran 2 model
Mehran2-Balão	Mehran 2 Balloon	Use of intra-aortic balloon pump in Mehran 2 model
Mehran 2-IC_III_ou_IV	Mehran 2 HF Class III/IV	Heart failure class III or IV in Mehran 2 model
Mehran2-Hipotensão	Mehran 2 Hypotension	Hypotension in Mehran 2 risk model
Mehran2-TFG	Mehran 2 GFR	Glomerular filtration rate in original Mehran 2 model
Mehran2-Balão	Mehran 2 Balloon	Use of intra-aortic balloon pump in Mehran 2 model
Mehran2-IC_III_ou_IV	Mehran 2 HF Class III/IV	Heart failure class III or IV in Mehran 2 model
Mehran-Total	Mehran Total Score	Total risk score in original Mehran model
Mehran2-diagnostico	Mehran2 Diagnosis SCA	SCA apresentation in Mehran2 risk model
Mehran2-tfg	Mehran2 GFR	Glomerular filtration rate in Mehran2 model
Mehran2-FEVE	Mehran2 LVEF	Left ventricular ejection fraction in Mehran2 model
Mehran2-DM	Mehran2 Diabetes Mellitus	Presence of diabetes mellitus in Mehran2 model
Mehran2-Hb	Mehran2 Hemoglobin	Hemoglobin level in Mehran2 model
Mehran2-Glicose	Mehran2 Glucose	Blood glucose level in Mehran2 model
Mehran2-IC_apresentação	Mehran2 Heart Failure Presentation	Heart failure classification in Mehran2 model
Mehran2-Idade	Mehran2 Age	Age in Mehran2 model
Mehran2-Total	Mehran2 Total Score	Total risk score in Mehran2 model
Mehran2-categorias	Mehran2 Risk Categories and Results	Categorization of risk in Mehran2 model
Mehran-hipotensão	Mehran Hypotension	Hypotension in original Mehran risk model
Mehran-tfg	Mehran GFR	Glomerular filtration rate in original Mehran model
Mehran-Balão	Mehran Balloon	Use of intra-aortic balloon pump in Mehran model
Mehran-IC_III_ou_IV	Mehran HF Class III/IV	Heart failure class III or IV in Mehran model
Mehran-Idade	Mehran Age	Age in Original Mehran model
Mehran-Anemia	Mehran Anemia	Anemia in Original Mehran model
Mehran-DM	Mehran Diabetes Mellitus	Presence of diabetes mellitus
Mehran-vol_contraste	Mehran-Volume contrast iodinated contrast	Mehran-Volume contrast iodinated contrast in Original Mehran model
Mehran-Total	Mehran Total Score	Total risk score in original Mehran model
Mehran-resultados categorias e risco	Mehran Risk Categories and Results	Categorization of risk in original Mehran model
													Mehran-hipotensão
													Mehran-tfg
													Mehran-Balão
													Mehran-IC_III_ou_IV
													Mehran-Idade
													Mehran-Anemia
													Mehran-DM
													Mehran-vol_contraste
													Mehran-Total
